1 **Sub-centrosomal mapping identifies augmin- $\gamma$ TuRC as part of a centriole-stabilizing**  
2 **scaffold**

3

4 Nina Schweizer<sup>1</sup>, Laurence Haren<sup>2</sup>, Ricardo Viais<sup>1</sup>, Cristina Lacasa<sup>1</sup>, Ilaria Dutto<sup>1</sup>, Andreas  
5 Merdes<sup>2</sup>, Jens Lüders<sup>1,\*</sup>

6

7 Affiliations:

8 <sup>1</sup> Mechanisms of Disease Programme, Institute for Research in Biomedicine (IRB

9 Barcelona), The Barcelona Institute of Science and Technology (BIST), 08028 Barcelona,

10 Spain

11 <sup>2</sup> Centre de Biologie du Développement, Centre de Biologie Intégrative, CNRS-Université

12 Toulouse III, 31062 Toulouse, France

13

14

15 \*Correspondence: [jens.luders@irbbarcelona.org](mailto:jens.luders@irbbarcelona.org)

16

17

18

19

20

21

22 **Short title:** Augmin and  $\gamma$ TuRC in the centriole lumen

23 **Key words:** centriole, augmin,  $\gamma$ TuRC, microtubules, ciliogenesis

24

25 **Abstract**

26 **Centriole biogenesis and maintenance are crucial for cells to generate cilia and**  
27 **assemble centrosomes that function as microtubule organizing centers (MTOCs).**  
28 **Centriole biogenesis and MTOC function both require the microtubule nucleator  $\gamma$ -**  
29 **tubulin ring complex ( $\gamma$ TuRC). The widely accepted view is that  $\gamma$ TuRC localizes to**  
30 **the pericentriolar material (PCM), where it nucleates microtubules.  $\gamma$ TuRC has also**  
31 **been observed at centriolar regions that lack PCM, but the significance of these**  
32 **findings is unclear. Here we have used expansion microscopy to map spatially and**  
33 **functionally distinct sub-populations of centrosomal  $\gamma$ TuRC including in the**  
34 **centriole lumen. Luminal localization is mediated by augmin and both complexes**  
35 **are linked to the centriole inner scaffold through POC5. Disruption of luminal**  
36 **localization impairs centriole stability and cilia assembly, defects that are also**  
37 **observed in  $\gamma$ TuRC mutant fibroblasts derived from a patient suffering from**  
38 **microcephaly with chorioretinopathy. These results identify a novel, non-canonical**  
39 **role of augmin- $\gamma$ TuRC in the centriole lumen that is linked to human disease.**

40

41

## 42 **Introduction**

43 Centrioles, which are at the core of the centrosome and template the formation of cilia, are  
44 formed by nine sets of microtubules that are arranged in a circular fashion so that they  
45 form the wall of a cylinder. In human cells, wall microtubules of mature centrioles are  
46 organized as triplets and doublets in the proximal and distal cylinder, respectively. Triplets  
47 consist of one inner, complete microtubule, the so-called A-tubule, and two incomplete B-  
48 and C-tubules that share part of their wall with the adjacent A- and B-tubule, respectively.  
49 Doublets consist of only A- and B-tubules <sup>1</sup>. In cycling cells formation of new centrioles is  
50 initiated during S phase and occurs laterally at mother centrioles <sup>2</sup>. The origin of centriolar  
51 wall microtubules is not clear. The finding that the nucleator  $\gamma$ TuRC is required for centriole  
52 biogenesis <sup>3-7</sup> and the observation that  $\gamma$ TuRC-shaped structures cap the minus-end of A-  
53 tubules <sup>8</sup>, suggest that at least the A-tubules arise by nucleation. During S/G2 phase  
54 daughter centrioles elongate and, after passing through mitosis, are converted to  
55 centrosomes through acquisition of PCM <sup>9</sup>. The PCM is the canonical site of  $\gamma$ TuRC  
56 localization, where it has a well-established role as a nucleator of microtubules that extend  
57 into the cytoplasm during interphase and are incorporated into the spindle during mitosis  
58 <sup>10-12</sup>. Electron microscopy (EM) and, more recently, super resolution microscopy have  
59 revealed localization of  $\gamma$ TuRC subunits also at the subdistal appendages <sup>13,14</sup> and in the  
60 lumen of mother centrioles <sup>5,15-17</sup>, but their roles at these sites were not investigated.  
61 During ciliogenesis, the mother centriole is transformed into a basal body and templates  
62 formation of the axoneme, a microtubule-based scaffold structure that is at the core of  
63 cilia. However, axoneme microtubules are believed to not require nucleation but originate  
64 from elongation of the doublet microtubules in the distal basal body wall <sup>18</sup>.

65 Here we have re-evaluated the long-standing view that  $\gamma$ TuRC is a component of  
66 the PCM and that its centrosomal role is to nucleate microtubules. We found that  $\gamma$ TuRC is

67 distributed as functionally distinct sub-populations on the outside and, in complex with  
68 augmin, in the lumen of centrioles. Luminal augmin- $\gamma$ TuRC does not nucleate microtubules  
69 but contributes to centriole integrity, maintaining the ability of centrioles to template  
70 formation of cilia.

71

## 72 **Results**

### 73 **$\gamma$ TuRC forms separable centrosomal sub-populations**

74 To identify potential centrosomal sub-populations of  $\gamma$ TuRC and elucidate whether these  
75 may have distinct functions, we analyzed the centrosomal localization of the  $\gamma$ TuRC  
76 targeting factor NEDD1 and of the core subunits  $\gamma$ -tubulin and GCP4 by expansion  
77 microscopy (ExM).  $\gamma$ TuRC subunits localized on the outer surface of both mother and  
78 daughter centrioles, visualized with anti-acetylated tubulin antibodies, in some cases  
79 displaying enrichment in the proximal part of mother centrioles. In addition, all three  
80 proteins were found in the centriole lumen (Fig. 1a,c,d,e). This localization pattern was  
81 fundamentally different from that of the bona-fide PCM components CDK5RAP2 and  
82 pericentrin, which associated only with the outer, proximal part of mother centrioles (Fig.  
83 1a). To re-evaluate the paradigm that centrosomal microtubules are nucleated in the PCM,  
84 we analyzed microtubule regrowth after cold-induced depolymerization. Whereas  
85 microtubules could not be detected in cold-treated cells, after a few seconds of warming  
86 microtubules were nucleated in close proximity of centriole cylinders (Fig. 1b).  
87 Microtubules grew preferentially from the proximal surface of mother centrioles, but were  
88 also observed along the entire centriole wall including at distal ends. Thus,  $\gamma$ TuRC and  
89 nucleation activity are generally associated with the outer surface of centrioles, with some  
90 enrichment in the region of the PCM.

91

## 92 **$\gamma$ TuRC co-localizes with augmin in the central lumen of centrioles**

93 Next, we focused on luminal  $\gamma$ TuRC. Interestingly, we found that subunits of the augmin  
94 complex, which recruits  $\gamma$ TuRC to spindle microtubules during mitosis<sup>19,20</sup>, colocalized  
95 with  $\gamma$ TuRC in the centriole lumen during interphase (Fig. 1c). Luminal localization was  
96 observed for both endogenous augmin subunits and EGFP-tagged recombinant versions  
97 (Fig. 1c, Supplementary Fig. 1a). By comparing the localizations of HAUS6 and NEDD1  
98 relative to SAS-6, which marks the cartwheel structure at the proximal end of daughter  
99 centrioles<sup>21</sup>, and centrin, a marker for the distal lumen of centrioles<sup>22</sup>, we found that in all  
100 cases NEDD1 and HAUS6 were found distal to the SAS-6 signal (Fig. 1d) and proximal to  
101 the bulk of the centrin signal (Fig. 1e). These results show that apart from  $\gamma$ TuRC that is  
102 recruited to the outside of centrioles, a separate pool colocalizes with augmin in the central  
103 region of the centriole lumen.

104

## 105 **Lumen recruitment of augmin and $\gamma$ TuRC occurs late during centriole elongation**

106 Interestingly, newly formed daughter centrioles frequently lacked luminal augmin and  
107  $\gamma$ TuRC, even though  $\gamma$ TuRC was visible on the outside of the daughter cylinder (Fig. 1e).  
108 Consistent with this, only a minor fraction of all daughter centrioles identified by centrin  
109 labeling, was also positive for luminal HAUS6 or NEDD1 staining (Fig. 1f). Measuring the  
110 distance between centrin foci of mother and daughter centrioles as a proxy for daughter  
111 centriole length revealed that these centrioles were more elongated than daughter  
112 centrioles that lacked these proteins (Fig. 1g), suggesting that augmin and  $\gamma$ TuRC localize  
113 to the lumen late during centriole biogenesis. Corroborating this result, accumulation of  
114 HAUS6 in the lumen of daughters coincided with poly-glutamylated tubulin, a tubulin modification  
115 that occurs selectively on the C-tubules of triplet microtubules<sup>23</sup> and that became  
116 detectable only after daughters had reached a substantial length (Supplementary Fig. 1b).

117 The most robust luminal HAUS6 signal was observed in mature centrioles, where it was  
118 confined to the proximal/central cylinder, marked by poly-glutamylation (Supplementary  
119 Fig. 1b).

120 Together our results indicate that  $\gamma$ TuRC localizes first to the outside of newly  
121 formed daughter centrioles and subsequently, during centriole elongation, accumulates  
122 with augmin in the centriole lumen (Fig. 1h).

123

### 124 **Centriole outer wall recruitment of $\gamma$ TuRC depends on CEP192**

125 Previous work implicated CEP192 in the recruitment of  $\gamma$ TuRC to centrosomes<sup>24,25</sup> and  
126 identified the targeting factor NEDD1 as proximity interactor of CEP192<sup>26,27</sup>, but did not  
127 distinguish between distinct sub-centrosomal sites. Super resolution microscopy detected  
128 CEP192 along the outer walls of mother and daughter centrioles (Fig. 2b)<sup>28</sup>. To re-  
129 evaluate CEP192's role in  $\gamma$ TuRC centrosome recruitment, cells were transfected with  
130 siRNA, synchronized in mitosis with the Eg5 inhibitor STLC and then, bypassing cell  
131 division, released into G1 by CDK1 inhibition (Fig. 2a). This setup avoided adverse effects  
132 on centrosomes from duplication failure<sup>24</sup>, and enriched interphase cells with fully  
133 elongated, CEP192-depleted centrioles. We found that CEP192 depletion removed  
134 NEDD1 specifically from the outside of centrioles, whereas the luminal pool of NEDD1  
135 appeared unaffected (Fig. 2b,c).

136

### 137 **Lumen recruitment of $\gamma$ TuRC requires augmin**

138 Considering their colocalization (Fig. 1c), we asked whether luminal recruitment of  $\gamma$ TuRC  
139 required augmin. Using the same experimental setup as before, we depleted cells of  
140 HAUS6 (Supplementary Fig. 2a). Strikingly, centrioles lacking HAUS6 also lacked  $\gamma$ -tubulin  
141 in the lumen (Fig. 2d), whereas  $\gamma$ -tubulin signals on the outside of centrioles could still be

142 detected (Fig. 2d). Importantly, we never observed HAUS6-negative centrioles that were  
143 positive for luminal  $\gamma$ -tubulin. We additionally analyzed  $\gamma$ TuRC lumen localization in mouse  
144 hippocampal neurons in which *Haus6* had been knocked out post-mitotically. We  
145 previously showed that during neuronal culture PCM-associated  $\gamma$ -tubulin is strongly  
146 downregulated and the remaining signal is centriole-associated<sup>29</sup>. Indeed, in neurons at  
147 nine days in vitro (DIV) both HAUS6 and  $\gamma$ -tubulin displayed centriolar localization.  
148 Strikingly, both proteins were largely absent from centrioles in conditional *Haus6* KO  
149 neurons (Supplementary Fig. 2b,c), indicating that residual centrosomal  $\gamma$ TuRC in  
150 differentiated neurons is luminal and recruited by the same augmin-dependent mechanism  
151 as in cycling cells. Since previous work showed that  $\gamma$ TuRC targeting is broadly mediated  
152 by NEDD1<sup>3,4</sup>, we also tested depletion of NEDD1. In this condition NEDD1 and  $\gamma$ -tubulin  
153 were absent from both the outside and the lumen of centrioles (Fig. 2e,f). Thus, outer wall  
154 localization of  $\gamma$ TuRC requires CEP192, luminal  $\gamma$ TuRC localization depends on augmin,  
155 and the targeting factor NEDD1 is required for recruitment to both sites.

156

### 157 **Centriolar augmin interacts with the inner scaffold protein POC5**

158 To learn more about the roles of augmin and  $\gamma$ TuRC in the centriole lumen, we performed  
159 biotin proximity labeling using HAUS6 fused to the BirA biotin ligase as bait and identified  
160 centriole-specific, biotinylated proteins by mass spectrometry (Fig. 3a, Supplementary Fig.  
161 3a,b). This approach identified POC5, a centrin-binding protein and component of a  
162 scaffold structure at the luminal surface of centrioles proposed to protect against  
163 mechanical stress<sup>30-32</sup>. Consistent with this, augmin subunits were previously found as  
164 proximity interactors in cells expressing POC5-BirA as bait<sup>26</sup>. POC5 was present in the  
165 lumen of mother centrioles and accumulated in the lumen of daughter centrioles after  
166 these had reached a significant length (Fig. 3b), resembling the behavior that we had

167 observed for luminal augmin and  $\gamma$ TuRC. POC5 and  $\gamma$ -tubulin were confined to the same  
168 central luminal region, but in end-on views  $\gamma$ -tubulin appeared to localize more interior than  
169 POC5 (Fig. 3b).

170

### 171 **POC5 is required for luminal recruitment of augmin- $\gamma$ TuRC**

172 Since we occasionally observed daughter centrioles that were positive for POC5, but  
173 lacked  $\gamma$ -tubulin in the lumen (Fig. 3b), we tested whether POC5 may function upstream of  
174 augmin and  $\gamma$ TuRC lumen recruitment. Using the mitotic arrest-release approach, we  
175 found that centrioles depleted of POC5 also lacked luminal HAUS6 and  $\gamma$ -tubulin, whereas  
176 both proteins were always present at centrioles in control cells (Fig. 3c,d). Previous  
177 analysis by cryo-electron tomography (cryo-ET) showed that the inner scaffold is a  
178 periodic, helical structure, lining the inner centriole wall <sup>32</sup>, likely composed of repeating  
179 units of scaffold protein complexes. Thus, scaffold proteins may tend to self-associate.  
180 Indeed, POC5 exogenously expressed in human cells forms filamentous structures in the  
181 cytoplasm that associate with other centriole proteins <sup>30</sup>. We confirmed this observation  
182 and found that these ectopic assemblies were also labeled with antibodies against HAUS6  
183 and  $\gamma$ -tubulin (Fig. 3e, Supplementary Fig. 3d). Together, these findings demonstrate that  
184 POC5, through interaction with augmin, recruits  $\gamma$ TuRC to the inner centriole scaffold.

185

### 186 **POC5 and augmin promote centriole integrity**

187 The inner scaffold was suggested to confer stability on centrioles <sup>32</sup>. When we quantified  
188 the number of centrioles at the end of the duplication cycle, by counting of centrin foci in  
189 mitotic cells, we found that POC5 depletion had no effect on the number of centrioles  
190 (Supplementary Fig. 4a). We also did not observe any change in centriole number after  
191 HAUS6 depletion (Supplementary Fig. 4b). However, when mitotic duration was extended



192 up to ~18 h by treatment with the Eg5 inhibitor STLC, centriole numbers in POC5 and  
193 HAUS6 RNAi cells declined: whereas 70-80% of control cells still had the expected  
194 number of at least 4 centrin foci, this number was observed in only ~35% of POC5  
195 depleted cells and ~50% of HAUS6 depleted cells (Fig. 4a,b,c,d), suggesting centriole  
196 destabilization. Time course experiments further revealed that the decline in centriole  
197 numbers correlated with the time spent in mitosis (Fig. 4e). We also assayed centriole  
198 stability in the non-cancer RPE1 cell line. To avoid p53-dependent G1 arrest caused by  
199 mitotic defects<sup>33</sup>, we induced cell cycle exit by serum withdrawal immediately after  
200 transfection of siRNA. After HAUS6 was efficiently depleted, we added serum for cell cycle  
201 re-entry, and STLC for prolonged mitotic arrest. Similar to U2OS cells, albeit less  
202 pronounced, centrioles in HAUS6-depleted RPE1 cells were also destabilized  
203 (Supplementary Fig. 4c).

204 Curiously, during prolonged mitotic arrest the number of centrioles in control cells  
205 also slightly decreased (Fig 4e). We speculated that this was due to premature loss of the  
206 cartwheel, which normally occurs at mitotic exit in a PLK1-dependent manner<sup>9,34</sup>. Indeed,  
207 in the presence of the PLK1 inhibitor BI2536 the cartwheel component SAS-6 was  
208 retained at daughter centrioles during prolonged mitotic arrest (Supplementary Fig. 4d,e).  
209 Counting of centrioles in PLK1-inhibited cells after prolonged mitotic arrest revealed that  
210 there was no significant difference in the percentage of cells with 4 or more centrioles  
211 between control and HAUS6 RNAi samples (~76% and ~69%; Fig. 4e), suggesting that  
212 centriole destabilization specifically affected cartwheel-less daughter centrioles.

213 The time-dependent disappearance of centrin foci in mitotically arrested cells may  
214 indicate complete centriole disassembly or merely loss of their distal, centrin-containing  
215 compartment. To distinguish between these possibilities, we quantified foci of centrobin,  
216 which localizes to the outer wall of daughter centrioles, in a central region<sup>35,36</sup>. In contrast  
217 to the reduction in centrin foci, a similar percentage of control and HAUS6 depleted cells

218 had the expected number of at least two centrin foci (~88% versus ~83%) (Fig. 4f,g),  
219 demonstrating that centrioles did not completely disassemble.

220

## 221 **POC5 and $\gamma$ TuRC are required for ciliogenesis**

222 While centriole destabilization was only observed upon prolonged mitosis, we  
223 hypothesized that cilia assembly, which relies on the elongation of microtubule doublets at  
224 the distal tip of mother centrioles, might naturally be sensitive to centriolar defects caused  
225 by the absence of luminal augmin- $\gamma$ TuRC. Since we were not able to efficiently remove  
226 HAUS6 from mother centrioles, we tested depletion of POC5, the scaffold protein most  
227 proximal to luminal HAUS6 (Fig. 3a). RPE1 cells were treated with control or POC5 siRNA  
228 and serum-starved to induce ciliogenesis. Whereas 67% of control cells had a cilium, only  
229 ~30% of POC5-depleted cells that lacked POC5 on both centrioles were ciliated (Fig.  
230 5a,b). Since POC5 depletion was shown to cause G1 arrest in RPE1 cells<sup>31</sup>, which could  
231 interfere with assaying ciliogenesis, we repeated the experiment in RPE1 *p53* KO cells. In  
232 this case ~55% of control cells were ciliated, whereas only ~14% of cells that lacked POC5  
233 on both centrioles possessed a cilium (Fig. 5b), confirming that loss of POC5 from the  
234 centriole lumen impairs ciliogenesis.

235 Mutations in  $\gamma$ TuRC subunits have been linked to developmental defects including  
236 primary microcephaly and retinopathy<sup>37-41</sup>. We hypothesized that some of the clinical  
237 manifestations may also involve centriole destabilization and impaired ciliogenesis. To  
238 address this, we analyzed the ability of GCP4 mutant fibroblasts, obtained from a patient  
239 diagnosed with microcephaly and chorioretinopathy<sup>38</sup>, to assemble cilia after serum  
240 starvation. Strikingly, only ~20% of GCP4 mutant fibroblasts were ciliated compared to  
241 ~80% of control fibroblasts (Fig. 5c,d). Additionally, cilia in patient fibroblasts were  
242 significantly shorter (Fig. 5e). Importantly, impaired ciliogenesis was not the consequence  
243 of defective centriole duplication (Fig. 5f). Moreover, mother centrioles had acquired

244 subdistal appendages, as determined by the presence of ODF2 and ninein (Fig. 5c),  
245 indicating proper maturation. Thus, in GCP4 mutant cells centrioles form and mature, but  
246 are defective in supporting cilia assembly and growth.

247

## 248 **Discussion**

249 Here we have identified novel, non-canonical roles of augmin and  $\gamma$ TuRC in the centriole  
250 lumen that are independent of their previously described functions in microtubule  
251 nucleation. In addition to nucleating microtubules, both protein complexes are linked to the  
252 centriole inner scaffold through POC5, contributing to centriole integrity. POC5 was  
253 recently mapped to the innermost region of the scaffold, a position well suited for  
254 anchoring augmin- $\gamma$ TuRC<sup>32</sup>. Augmin is known to directly interact with microtubules  
255 through its HAUS8 subunit<sup>42</sup> and this interaction is independent of its ability to recruit  
256  $\gamma$ TuRC<sup>42,43</sup>. Thus, it is tempting to speculate that augmin, apart from interacting with  
257 POC5, may also directly bind and stabilize microtubules of the centriole wall. Curiously,  
258 shape and dimension of native and reconstituted augmin<sup>42,43</sup> have striking similarity to  
259 unassigned Y- and L-shaped linker structures that are connected to A- and B-tubules of  
260 the centriole wall and protrude into the lumen<sup>44-46</sup>. However, further work is needed to  
261 more precisely map the configuration of luminal augmin.

262         Considering the periodicity of the inner scaffold structure<sup>32,44</sup> and our observation  
263 that augmin and  $\gamma$ TuRC are distributed along the entire length of the central lumen, one  
264 can speculate that multiple copies of augmin and  $\gamma$ TuRC may adopt a stacked  
265 configuration at the inner centriole wall. Since both augmin and  $\gamma$ TuRC are large, multi-  
266 subunit complexes, they would be expected to form prominent structures in the centriole  
267 lumen. Indeed, several EM and cryo-ET studies have described unidentified densities  
268 including ring-shaped structures in the centriole lumen<sup>44,45,47,48</sup>. The fact that these are not

269 consistently observed may indicate sensitivity of augmin and  $\gamma$ TuRC to the conditions used  
270 for sample preparation. While the precise arrangement of luminal augmin and  $\gamma$ TuRC  
271 remains to be determined, we showed that their specific loss from the lumen impairs  
272 centriole integrity and ciliogenesis, similar to defects observed after depletion of WDR90,  
273 which functions more upstream in the recruitment of scaffold proteins <sup>46</sup>. Based on our  
274 results, augmin and  $\gamma$ TuRC may be considered components of the inner scaffold, which  
275 may thus extend farther into the centriole lumen than previously anticipated. Our findings  
276 also suggest that the integrity of the entire extended scaffold structure is required for its  
277 centriole-stabilizing and ciliogenesis-promoting function.

278 Importantly, the impairment of ciliogenesis caused by displacement of luminal  
279 augmin- $\gamma$ TuRC is also observed in patient-derived  $\gamma$ TuRC mutant fibroblasts. Thus,  
280 phenotypes previously ascribed to augmin or  $\gamma$ TuRC deficiency may not solely be related  
281 to their function as microtubule nucleators, but also to their luminal roles in promoting  
282 centriole integrity.

283

## 284 **Methods**

285 **Cell culture and treatments.** U2OS cells and hTERT RPE1 cells were cultured in DMEM  
286 and DMEM/F12 (Invitrogen), respectively, with 10% fetal bovine serum (FBS) and  
287 PenStrep (both Gibco). Parental cell lines were obtained from ATCC, hTERT RPE1 *p53* <sup>-/-</sup>  
288 cells were provided by Meng-Fu Bryan Tsou <sup>49</sup>. U2OS cells stably expressing POC5-GFP,  
289 EGFP-HAUS8, EGFP-HAUS6 or BirA-HAUS6 were generated by transfection of the  
290 appropriate expression plasmid, followed by either the selection with 1 mg/ml geneticin  
291 (Gibco) or by FACS. Human fibroblasts were derived from skin biopsy from a control  
292 individual (WT) and a patient with GCP4 mutations (All-1) <sup>38</sup> and cultured in DMEM with  
293 15% FBS and PenStrep. All cell lines were kept in a 37°C incubator with 5% CO<sub>2</sub> and a  
294 humidified atmosphere. For the induction of ciliogenesis, cells were incubated in DMEM

295 without FBS for 48 h. G2 arrest or mitotic exit was induced with 10  $\mu$ M RO-3306 (Sigma).  
296 Mitotic arrest was induced with 10  $\mu$ M STLC (Sigma). PLK1 was inhibited with 100 nM  
297 BI2536 (Adooq Bioscience).

298

299 **Generation of mouse strains.** A neuronal specific *Haus6* conditional KO mouse strain  
300 was generated by crossing *Haus6* floxed (*Haus6<sup>fl</sup>*) mice<sup>50</sup> (RBRC09630, Accession No.  
301 CDB1354K (<http://www2.clst.riken.jp/arg/mutant%20mice%20list.html>) with B6.Tg(Act16b-  
302 Cre)4092Jiwu/J mice (Jackson Laboratories). Mouse strains were maintained on a mixed  
303 C57BL/6 background in strict accordance with the European Community (2010/63/UE)  
304 guidelines in the Specific-Pathogen Free (SPF) animal facilities of the Barcelona Science  
305 Park (PCB). All protocols were approved by the Animal Care and Use Committee of the  
306 PCB/University of Barcelona (IACUC; CEEA-PCB) and by the Departament de Territori I  
307 Sostenibilitat of the Generalitat de Catalunya in accordance with applicable legislation  
308 (Real Decreto 53/2013).

309

310 **Mice genotyping.** DNA was extracted from tail biopsies by digesting biopsies with 0.4  
311 mg/mL Proteinase K in 10 mM Tris-HCl, 20 mM NaCl, 0.2% SDS and 0.5 mM EDTA  
312 overnight at 56°C, followed by DNA precipitation with isopropanol. Genotyping was  
313 performed by PCR using the following primers: mAug6KO\_FW, 5'-  
314 CAACCCGAGCAACAGAAACC-3' and mAug6KO\_Rev, 5'-  
315 CCTCCACCAACTACAGACC-3' to detect *Haus6* WT, *Haus6* floxed and *Haus6* KO  
316 alleles; 26994, 5'-GCTGGAAGATGGCGATTAGC-3' and 30672, 5'-  
317 TCAGCCTGGTTACAAGGAACA-3' to detect the Cre-recombinase transgene, primers  
318 oIMR7338, 5'-CTAGGCCACAGAATTGAAAGATCT-3' and oIMR7339, 5'-  
319 GTAGGTGGAAATTCTAGCATCATCC-3' were used as internal PCR controls.

320

321 **Neuron cell culture.** For obtaining embryonic hippocampal tissue, timed pregnant mice  
322 were sacrificed by cervical dislocation. Cell cultures were prepared from e17.5-18.5 mouse  
323 embryos as described previously<sup>29</sup>. Briefly, tissue was dissected in Hank's solution  
324 (Merck), incubated in 0.25% trypsin (Life Technologies) and 1 mg/ml DNase (Roche) for  
325 15 min at 37°C and dissociated into single cells by gentle pipetting. Cells were seeded on  
326 poly-D-lysine coated glass cover slips in DMEM (Invitrogen) with 10% FBS and PenStrep  
327 (both Gibco). 2 h after plating, the medium was replaced with Neurobasal medium with  
328 0.6% Glucose, 2% B27, Glutamax (all Life Technologies) and PenStrep (Gibco) and cells  
329 were kept in a 37°C incubator with 5% CO<sub>2</sub> and a humidified atmosphere. At 3 DIV, 1 µM  
330 cytosine arabinoside (Sigma) was added to the medium.

331

332 **Immunofluorescence microscopy and expansion microscopy.** Cells were grown on  
333 poly-L-lysine- or poly-D-lysine- (neurons) coated coverslips and fixed with methanol at  
334 -20°C for a minimum of 15 min or with 3.7% paraformaldehyde at 37°C, followed by  
335 methanol at -20°C as described for the microtubule regrowth assays. To visualize  
336 centrioles with  $\alpha$ -tubulin or acetylated  $\alpha$ -tubulin, cells were incubated on ice for 30 min to  
337 depolymerize cytoplasmic microtubules before fixation. To remove cytoplasmic  
338 background (stainings of centrioles for  $\alpha$ -tubulin or EGFP-HAUS6) cells were pre-  
339 extracted in ice-cold PHEM (60 mM PIPES, 25 mM HEPES, 10 mM EGTA, 2 mM MgCl<sub>2</sub>)  
340 pH 6.9 with 0.1% Triton X-100 for 1-2 min before fixation. Fixed cells were washed with  
341 PBS and blocked in PBS-BT (PBS, 3% BSA, 0.1% Triton X-100) for 1 h at RT, followed by  
342 the incubation with primary antibodies in PBS-BT either for 1 h at RT or overnight at 4°C.  
343 After washes in PBS-T (PBS, 0.1% Triton X-100) cells were incubated with secondary  
344 antibodies and 0.5 µg/ml DAPI (where appropriate) in PBS-BT for 1 h at RT. Cells were  
345 washed in PBS-T and either mounted in ProLong Gold Antifade (Thermofisher) on glass  
346 slides or further processed for ExM, as described previously<sup>51</sup>: cells were washed with

347 PBS and subsequently incubated in 0.1 mg/ml Acryloyl X (Life Technologies) in PBS at RT  
348 overnight. Cells were washed in monomer solution (1 x PBS, 2 M NaCl, 2.5% acrylamide  
349 (Bio-Rad), 0.15% Methylenebisacrylamide (Santa Cruz), 8.625% sodium acrylate (Sigma)  
350 and embedded in monomer solution containing 0.2% APS and 0.2% TEMED. Gels were  
351 polymerized for 2 h at 37°C and then digested with 8 U/ml Proteinase K (Invitrogen) in 50  
352 mM Tris-HCl pH 8, 1 mM EDTA, 1 M NaCl, 0.5% Triton X-100 for 4 h at 37°C. Gels were  
353 expanded in MilliQ (expansion factor ~4) and mounted on poly-L-lysine-coated coverslips  
354 for imaging.

355 Images were acquired with an Orca AG camera (Hamamatsu) on a Leica  
356 DMI6000B microscope equipped with a 1.4 NA 100× oil immersion objective. AF6000  
357 software (Leica) was used for image acquisition and blind deconvolution. Alternatively,  
358 images were acquired with an MRm camera on an Axiovert 200M (Carl Zeiss) using a 1.4  
359 NA 63× Plan Apo objective and Axiovision software (Fig. 5c). Images were processed in  
360 ImageJ and Photoshop (Adobe) and represent maximum projections of a deconvolved  
361 stack or a single section. Image J was used for the quantification of fluorescence  
362 intensities. Images were acquired with constant exposure settings and pixel grey levels of  
363 the focused z plane were measured within a region of interest (ROI) encompassing a  
364 single centriole. Background fluorescence was measured adjacent to the ROI and  
365 subtracted.

366

367 **Western blotting (WB).** Cells were washed in PBS and lysed in 50 mM HEPES, pH 7.5,  
368 150 mM NaCl, 1 mM MgCl<sub>2</sub>, 1 mM EGTA, 0.5% NP-40 and protease inhibitors (Roche) for  
369 at least 10 minutes on ice. Extract was cleared by centrifugation and subjected to SDS  
370 PAGE, followed by the transfer of proteins to PVDF membranes by tank blotting.  
371 Subsequently, membranes were blocked and probed with antibodies.

372

373 **Antibodies.** Generation of rabbit polyclonal antibodies against HAUS6 (WB, 1:2000, IF,  
374 1:1000 or 1:500 (ExM)) and GCP4 (ExM, 1:100) has been described previously <sup>7,52</sup>. Other  
375 antibodies used in this study were: mouse anti- $\gamma$ -tubulin (TU-30, Exbio; IF, 1:500 or 1:250  
376 (ExM)), rabbit anti- $\gamma$ -tubulin R75 <sup>53</sup> (1:1000), rabbit anti- $\alpha$ -tubulin (ab18251, Abcam; ExM,  
377 1:300), mouse anti-acetylated  $\alpha$ -tubulin (clone 6-11B-1, Merck; ExM, 1:250), mouse anti-  
378 acetylated  $\alpha$ -tubulin (T7451, Sigma; IF, 1:1000), mouse anti-polyglutamylated tubulin  
379 (GT335, AdipoGen; ExM, 1:250), rabbit anti-NEDD1 <sup>4</sup> (ExM, 1:250), rabbit anti-HAUS5 <sup>19</sup>  
380 (ExM, 1:100), rabbit anti-pericentrin <sup>4</sup> (ExM, 1:250), rabbit anti-GFP (A6455, Invitrogen;  
381 ExM, 1:250), chicken anti-GFP (GFP-1020, Aves Labs; ExM, 1: 1:250), mouse anti-centrin  
382 1 (clone 20H5, Millipore; IF, 1:500 or 1:250 (ExM)), rabbit anti-POC5 (A303-341A, Bethyl  
383 Laboratories; WB, 1: 2500, IF: 1:500 or 1:250 (ExM)), mouse anti-SAS-6 (sc-81431, Santa  
384 Cruz; IF, 1:100 or 1:50 (ExM)), mouse anti-centrobin <sup>54</sup> (IF, 1:500), rabbit anti-ninein <sup>55</sup> (IF,  
385 1:100), rabbit anti-ODF2 (43840, Abcam; IF, 1:500), mouse anti-ARL13B (sc-515784,  
386 Santa Cruz; IF, 1:100), rabbit anti-CEP192 <sup>24</sup> (ExM, 1:500), mouse anti-GAPDH (sc-  
387 47724, Santa Cruz Biotechnology; WB, 1:10000). Alexa-Fluor-488-, Alexa-Fluor-568- and  
388 Alexa-Fluor-647-conjugated, cross-adsorbed secondary antibodies were obtained from  
389 Thermo Fisher (1:500 or 1:100 (ExM)). Streptavidin Alexa Fluor 594 was obtained from  
390 Invitrogen (1:5000). Horseradish-peroxidase-coupled secondary antibodies for WB were  
391 obtained from Jackson ImmunoResearch Laboratories (1:5000).

392

393 **Plasmids.** The EGFP-HAUS8 expression plasmid was provided by Laurence Pelletier <sup>19</sup>.  
394 The POC5-GFP expression plasmid was obtained from Ciaran Morrison <sup>30</sup>. The plasmid  
395 expressing EGFP-HAUS6 was generated by cloning HAUS6 cDNA into pCS2-EGFP using  
396 *Ascl* and *Fse1* restriction sites. Site-directed mutagenesis was used to render EGFP-  
397 HAUS6 RNAi-insensitive (HAUS6 591A>G; 594T>C; 597G>A; 600G>C). A plasmid for  
398 expression of BirA-HAUS6 was generated by subcloning RNAi-insensitive HAUS6 into



399 pCDNA5 FLAG-BirA<sup>R118G</sup> (provided by Brian Raught)<sup>56</sup>. Subsequently, FLAG-BirA<sup>R118G</sup>–  
400 HAUS6 was amplified by PCR and inserted into pEGFP-N1, replacing EGFP.

401

402 **Microtubule regrowth assay.** U2OS cells were grown on poly-L-lysine-coated coverslips  
403 and incubated on ice for 40 min to depolymerize cytoplasmic microtubules. For  
404 microtubule regrowth, coverslips were transferred into 3.7% paraformaldehyde at 37°C for  
405 1 min, followed by the incubation in methanol at –20°C for a minimum of 15 min. For the  
406 negative control (no microtubule regrowth), cells were incubated in 3.7%  
407 paraformaldehyde on ice for 10 min, followed by the incubation in methanol at –20°C for a  
408 minimum of 15 min.

409

410 **Transfection of plasmid and siRNA.** Lipofectamine 2000 (Invitrogen) was used for the  
411 transfection of expression plasmids. Depletion of CEP192, HAUS6, NEDD1 and POC5  
412 was performed by transfecting cells with the following siRNA oligonucleotides (Sigma)  
413 CEP192, 5'-AAGGAAGACAUUUUCAUCUCU-3'; HAUS6, 5'-  
414 CAGUUAAGCAGGUACGAA-3'; NEDD1, 5'-GCAGACAUGUGUCAUUUGTT-3'; POC5,  
415 5'-CAACAAUUCUAGUCAUA-3'; using Lipofectamine RNAiMAX (Invitrogen). siRNA  
416 oligos against luciferase (5'-UCGAAGUAUCCGCGUACG-3') were used as control.

417

418 **Centrosome isolation and BioID.** BioID from centrosomes was performed as described  
419 previously<sup>27</sup>. Briefly, ten 15 cm dishes of U2OS cells stably expressing BirA-HAUS6 or  
420 parental U2OS cells (negative control) were incubated in culture medium containing 50 µM  
421 Biotin (Bio Basic) overnight. Subsequently, the medium was replaced and cells were  
422 incubated in culture medium containing 5 µg/ml nocodazole (Sigma) for 1 h. Cells were  
423 then washed with ice-cold HB buffer (20 mM HEPES pH 7.8, 5 mM K-acetate, 0.5 mM  
424 MgCl<sub>2</sub>, 0.5 mM DTT) and protease inhibitors (Roche) and incubated in 3 ml HB buffer for

425 10 min at 4°C. Cells were scraped from the plate and transferred into a 15 ml dounce  
426 homogenizer. After homogenization the lysate was centrifuged at 1500xg at 4°C for 5 min  
427 to pellet nuclei. Supernatant was collected and the pellet was washed again with HB buffer  
428 and centrifuged. Both supernatants were combined and 0.1% Triton X-100 was added,  
429 before the lysate was centrifuged at 1500xg at 4°C for 5 min. Supernatant was collected  
430 and loaded onto a sucrose gradient (discontinuous sucrose gradient prepared with 5 ml of  
431 70%, 3 ml of 50% and 3 ml of 40% sucrose) in Ultra-Clear Beckman tubes and centrifuged  
432 at 26000 rpm (SW32Ti rotor, Beckman Coulter) for 1 h at 4°C. 500 µl fractions were  
433 collected and centrosome enrichment was determined by analyzing 10 µl of each fraction  
434 by WB using anti-γ-tubulin and anti-centrin antibodies. Centrosome-containing fractions  
435 were pooled and resuspended in lysis buffer (50 mM Tris pH 7.4, 500 mM NaCl, 0.4%  
436 SDS, 5 mM EDTA, 1 mM DTT, 2% Triton X-100, protease inhibitors). Samples were  
437 sonicated and equal volumes of ice-cold 50 mM Tris pH 7.4 was added. Lysates were  
438 centrifuged at 15000 rpm (JA 25.50 rotor, Beckman Coulter) for 10 min at 4°C.  
439 Supernatant was added to streptavidin agarose resin and incubated for 3 h at 4°C. Beads  
440 were washed several times with different wash buffers (buffer 1: 2% SDS in H<sub>2</sub>O; buffer 2:  
441 0.2% deoxycholate, 1% Triton X-100, 500 mM NaCl, 1 mM EDTA, 50 mM HEPES pH 7.5;  
442 buffer 3: 10 mM Tris pH 8.1, 250 mM LiCl, 0.5% NP-40, 0.5% deoxycholate, 1% Triton X-  
443 100, 500 mM NaCl, 1 mM EDTA; buffer 4: 50 mM Tris pH 7.4, 50 mM NaCl) and finally  
444 resuspended in 100 µl of 50 mM NH<sub>4</sub>HCO<sub>3</sub>.

445

446 **Mass spectrometry analysis.** Samples were digested with 1.08 µg (0.1 µg/µl) trypsin in  
447 50 mM NH<sub>4</sub>HCO<sub>3</sub> at 37°C overnight. Additional 1.08 µg trypsin was added and samples  
448 were incubated for 2 h at 37°C before formic acid was added (1% final concentration).  
449 Samples were cleaned through C18 tips (polyLC C18) and peptides were eluted with 80%  
450 acetonitrile/1% formic acid and diluted to 20% acetonitrile/0.25% formic acid before

451 loading into strong cation exchange columns (polyLC SCX). Peptides were eluted in 5%  
452 NH<sub>4</sub>OH/30% methanol. Samples were evaporated to dryness and reconstituted in H<sub>2</sub>O  
453 with 3% acetonitrile/1% formic acid in a total volume of 50 µl. For mass spectrometry  
454 analysis, the reconstituted sample was further diluted 1:8 in H<sub>2</sub>O with 3% acetonitrile/1%  
455 formic acid. Samples were injected by triplicate (5µl per injection).

456 Sample was loaded at a flow rate of 15 µl/min on a 300 µm x 5 mm PepMap100, 5  
457 µm, 100 Å, C18 µ-precolumn using a Thermo Scientific Dionex Ultimate 3000  
458 chromatographic system (Thermo Scientific). Peptide separation was done with a 90 min  
459 run on a C18 analytical column (Acclaim PepMapR RSLC 75 µm × 50 cm, nanoViper,  
460 C18, 2 µm, 100 Å, Thermo Scientific), comprising three consecutive steps with linear  
461 gradients from 3 to 35% B in 60 min, from 35 to 50% B in 5 min, and from 50% to 85% B  
462 in 2 min. Isocratic elution was done at 85% B in 5 min and stabilization to initial conditions  
463 (A= 0.1% formic acid in H<sub>2</sub>O, B= 0.1% formic acid in CH<sub>3</sub>CN). The outlet of the column  
464 was directly connected to a TriVersa NanoMate (Advion) fitted on an Orbitrap Fusion  
465 Lumos™ Tribrid (Thermo Scientific). The mass spectrometer was operated in a data-  
466 dependent acquisition mode, survey MS scans were acquired with a resolution of 120,000  
467 (defined at 200 m/z), and lock mass was defined at 445.12 m/z in each scan. In each scan  
468 the top speed (most intense) ions were fragmented by CID and detected in the linear ion  
469 trap. The ion count target values for survey and MS/MS scans were 400,000 and 10,000,  
470 respectively. Target ions already selected for MS/MS were dynamically excluded for 15 s.  
471 Spray voltage in the NanoMate source was set to 1.60 kV. RF Lens was tuned to 30%.  
472 Minimal signal required to trigger MS to MS/MS switch was set to 5,000. The spectrometer  
473 was working in positive polarity mode and singly charge state precursors were rejected for  
474 fragmentation. Database searching was done with Proteome Discoverer software  
475 v2.1.0.81 (Thermo) using Sequest HT search engine and SwissProt Human release 2018  
476 01 and manually introduced contaminants database and user proteins. Searches against

477 targeted and decoy database were used for determining the false discovery rate (FDR).  
478 Search parameters for trypsin enzyme specificity allowed for two missed cleavage sites,  
479 oxidation in M and acetylation in protein N-terminus. Peptide mass tolerance was 10 ppm  
480 and the MS/MS tolerance was 0.6 Da. Peptides with q-value lower than 0.1 and FDR < 1%  
481 were considered as positive with a high confidence level.

482 For the quantitative analysis contaminant identifications were removed and unique  
483 peptide spectrum matches of protein groups identified with Sequest HT were analyzed  
484 with SAINTexpress-spc v3.11<sup>57</sup>. High confidence interactors were defined as those with  
485 Bayesian false discovery rate  $BFDR \leq 0.02$ .

486

487 **Statistical analysis and replication of experiments.** Statistical analysis was performed  
488 using Prism 7 software. For quantifications of the accumulation of HAUS6/NEDD1 at  
489 distinct centriolar sites (Fig. 1f), centriole numbers (Fig. 4b,d,e,g, Supplementary Fig. 4e),  
490 the mean of independent experiments was first determined and statistics were performed  
491 on the entirety of the obtained means. Normality of data distribution within a data set was  
492 tested with a D'Agostino-Pearson normality test (Fig. 1g, Fig. 5e, Supplementary Fig. 2c)  
493 or a Shapiro-Wilk normality test (Fig. 1f, Fig. 4b,d,e,g, Fig. 5. b,d, Supplementary Fig. 4c),  
494 depending on sample size. Significances between two data sets were determined using an  
495 unpaired two-tailed Student's t-test (Fig. 1f,g, Fig. 4b,d,e,g, Fig. 5b,d,e, Supplementary  
496 Fig. 4c,e) or a Mann-Whitney test (Fig. 4e (data set with BI2563), Supplementary Fig. 2c).  
497 The results, together with the number of independent experiments and sample sizes, are  
498 reported in the figures and figure legends. Protein localizations/dependencies and  
499 microtubule regrowth along the centriole wall has been confirmed in at least two  
500 independent experiments, except for CEP192 wall localization and its loss upon CEP192  
501 RNAi (Fig. 2b). The displayed images are representative examples. The BioID (Fig. 3a,  
502 Supplementary Fig. 3b) was performed once.

503

## 504 **Acknowledgements**

505 NS was supported by an EMBO long-term fellowship (ALTF 820-2015) and a Marie  
506 Skłodowska-Curie Action fellowship: This project has received funding from the European  
507 Union's Horizon 2020 research and innovation programme under the Marie Skłodowska-  
508 Curie grant agreement No 703907. ID was funded by the European Union's Horizon 2020  
509 research and innovation programme under the Marie Skłodowska-Curie grant agreement  
510 No. 754510. LH and AM were in part supported by grant 13-BSV8-0007-01 from "Agence  
511 Nationale de la Recherche" (France), and by grant SFI20121205511 from "Fondation ARC  
512 pour la recherche sur le cancer". JL acknowledges support by grants BFU2015-69275-P  
513 (MINECO/FEDER), PGC2018-099562-B-I00 (MICINN), 2017 SGR 1089 (AGAUR) and by  
514 intramural funds of IRB Barcelona, recipient of a Severo Ochoa Centre of Excellence  
515 Award from the Spanish Ministry of Science and Innovation and supported by CERCA  
516 (Generalitat de Catalunya). We thank the IRB Mass Spectrometry & Proteomics Core  
517 Facility, a member of ProteoRed, PRB3-ISCI, supported by grant PRB3 (IPT17/0019 -  
518 ISCIISGEFI/ERDF), and the Animal Facility of the Parc Scientific de Barcelona for  
519 excellent support. We thank H el ene Dollfus (University of Strasbourg, Strasbourg, France),  
520 Meng-Fu Bryan Tsou (Memorial Sloan Kettering Cancer Center, New York, USA),  
521 Laurence Pelletier (Lunenfeld-Tanenbaum Research Institute, Toronto, Canada), Ciaran  
522 Morrison (National University of Ireland, Galway, Ireland) and Brian Raught (Ontario  
523 Cancer Institute and Department of Medical Biophysics, University of Toronto, Toronto,  
524 Canada) for cells and reagents.

525

## 526 **Author contributions**

527 NS designed experimental strategies, performed most of the experiments, prepared  
528 figures and contributed to manuscript writing. LH performed experiments with patient

529 fibroblasts. RV generated conditional *Haus6* KO mice and prepared neuronal cultures. CL  
530 supervised animal experiments and performed the BioID experiment. ID performed some  
531 of the POC5 RNAi experiments in RPE1 *p53* <sup>-/-</sup> cells. AM supervised experiments with  
532 patient fibroblasts. JL supervised the study, proposed experimental strategies, and  
533 contributed to manuscript writing.

534

### 535 **Competing interests**

536 The authors declare that they have no competing interests.

537

### 538 **References**

- 539 1. Winey, M. & O'Toole, E. Centriole structure. *Philos. Trans. R. Soc. Lond., B, Biol.*  
540 *Sci.* **369**, (2014).
- 541 2. Nigg, E. A. & Holland, A. J. Once and only once: mechanisms of centriole  
542 duplication and their deregulation in disease. *Nat Rev Mol Cell Biol* **19**, 297–312  
543 (2018).
- 544 3. Haren, L. *et al.* NEDD1-dependent recruitment of the gamma-tubulin ring complex to  
545 the centrosome is necessary for centriole duplication and spindle assembly. *J Cell*  
546 *Biol* **172**, 505–515 (2006).
- 547 4. Lüders, J., Patel, U. K. & Stearns, T. GCP-WD is a gamma-tubulin targeting factor  
548 required for centrosomal and chromatin-mediated microtubule nucleation. *Nat Cell*  
549 *Biol* **8**, 137–147 (2006).
- 550 5. Bahtz, R. *et al.* GCP6 is a substrate of Plk4 and required for centriole duplication.  
551 *Journal of Cell Science* **125**, 486–496 (2012).
- 552 6. Kleylein-Sohn, J. *et al.* Plk4-induced centriole biogenesis in human cells. *Dev Cell*  
553 **13**, 190–202 (2007).
- 554 7. Cota, R. R. *et al.* MZT1 regulates microtubule nucleation by linking  $\gamma$ TuRC assembly

- 555 to adapter-mediated targeting and activation. *Journal of Cell Science* **130**, 406–419  
556 (2017).
- 557 8. Guichard, P., Chrétien, D., Marco, S. & Tassin, A.-M. Procentriole assembly  
558 revealed by cryo-electron tomography. *EMBO J* **29**, 1565–1572 (2010).
- 559 9. Wang, W.-J., Soni, R. K., Uryu, K. & Bryan Tsou, M.-F. The conversion of centrioles  
560 to centrosomes: essential coupling of duplication with segregation. *J Cell Biol* **193**,  
561 727–739 (2011).
- 562 10. Ito, D. & Bettencourt-Dias, M. Centrosome Remodelling in Evolution. *Cells* **7**, (2018).
- 563 11. Prosser, S. L. & Pelletier, L. Mitotic spindle assembly in animal cells: a fine  
564 balancing act. *Nat Rev Mol Cell Biol* **18**, 187–201 (2017).
- 565 12. Gould, R. R. & Borisy, G. G. The pericentriolar material in Chinese hamster ovary  
566 cells nucleates microtubule formation. *J Cell Biol* **73**, 601–615 (1977).
- 567 13. Tassin, A. M., Celati, C., Moudjou, M. & Bornens, M. Characterization of the human  
568 homologue of the yeast spc98p and its association with gamma-tubulin. *J Cell Biol*  
569 **141**, 689–701 (1998).
- 570 14. Chong, W. M. *et al.* Super-resolution microscopy reveals coupling between  
571 mammalian centriole subdistal appendages and distal appendages. *Elife* **9**, (2020).
- 572 15. Fuller, S. D. *et al.* The core of the mammalian centriole contains gamma-tubulin.  
573 *Current Biology* **5**, 1384–1393 (1995).
- 574 16. Moudjou, M., Bordes, N., Paintrand, M. & Bornens, M. gamma-Tubulin in  
575 mammalian cells: the centrosomal and the cytosolic forms. *J Cell Sci* **109 ( Pt 4)**,  
576 875–887 (1996).
- 577 17. Sonnen, K. F., Schermelleh, L., Leonhardt, H. & Nigg, E. A. 3D-structured  
578 illumination microscopy provides novel insight into architecture of human  
579 centrosomes. *Biology Open* **1**, 965–976 (2012).
- 580 18. Ishikawa, H. & Marshall, W. F. Ciliogenesis: building the cell's antenna. *Nat Rev Mol*

- 581 *Cell Biol* **12**, 222–234 (2011).
- 582 19. Lawo, S. *et al.* HAUS, the 8-subunit human Augmin complex, regulates centrosome  
583 and spindle integrity. *Curr Biol* **19**, 816–826 (2009).
- 584 20. Goshima, G., Mayer, M., Zhang, N., Stuurman, N. & Vale, R. D. Augmin: a protein  
585 complex required for centrosome-independent microtubule generation within the  
586 spindle. *J Cell Biol* **181**, 421–429 (2008).
- 587 21. Guichard, P., Hamel, V. & Gönczy, P. The Rise of the Cartwheel: Seeding the  
588 Centriole Organelle. *Bioessays* **40**, e1700241 (2018).
- 589 22. Paoletti, A., Moudjou, M., Paintrand, M., Salisbury, J. L. & Bornens, M. Most of  
590 centrin in animal cells is not centrosome-associated and centrosomal centrin is  
591 confined to the distal lumen of centrioles. *J Cell Sci* **109 ( Pt 13)**, 3089–3102 (1996).
- 592 23. Gambarotto, D. *et al.* Imaging cellular ultrastructures using expansion microscopy  
593 (U-ExM). *Nat Meth* **16**, 71–74 (2019).
- 594 24. Zhu, F. *et al.* The mammalian SPD-2 ortholog Cep192 regulates centrosome  
595 biogenesis. *Curr Biol* **18**, 136–141 (2008).
- 596 25. Gomez-Ferreria, M. A. *et al.* Human Cep192 is required for mitotic centrosome and  
597 spindle assembly. *Curr Biol* **17**, 1960–1966 (2007).
- 598 26. Gupta, G. D. *et al.* A Dynamic Protein Interaction Landscape of the Human  
599 Centrosome-Cilium Interface. *Cell* **163**, 1484–1499 (2015).
- 600 27. Firat-Karalar, E. N., Rauniyar, N., Yates, J. R. & Stearns, T. Proximity interactions  
601 among centrosome components identify regulators of centriole duplication. *Curr Biol*  
602 **24**, 664–670 (2014).
- 603 28. Sonnen, K. F., Gabryjonczyk, A.-M., Anselm, E., Stierhof, Y.-D. & Nigg, E. A. Human  
604 Cep192 and Cep152 cooperate in Plk4 recruitment and centriole duplication. *Journal*  
605 *of Cell Science* **126**, 3223–3233 (2013).
- 606 29. Sánchez-Huertas, C. *et al.* Non-centrosomal nucleation mediated by augmin



- 607 organizes microtubules in post-mitotic neurons and controls axonal microtubule  
608 polarity. *Nat Comms* **7**, 12187 (2016).
- 609 30. Dantas, T. J. *et al.* Calcium-binding capacity of centrin2 is required for linear POC5  
610 assembly but not for nucleotide excision repair. *PLoS ONE* **8**, e68487 (2013).
- 611 31. Azimzadeh, J. *et al.* hPOC5 is a centrin-binding protein required for assembly of full-  
612 length centrioles. *J Cell Biol* **185**, 101–114 (2009).
- 613 32. Le Guennec, M. *et al.* A helical inner scaffold provides a structural basis for centriole  
614 cohesion. *Science Advances* **6**, eaaz4137 (2020).
- 615 33. Lambrus, B. G. & Holland, A. J. A New Mode of Mitotic Surveillance. *Trends Cell*  
616 *Biol* **27**, 314–321 (2017).
- 617 34. Arquint, C. & Nigg, E. A. STIL microcephaly mutations interfere with APC/C-  
618 mediated degradation and cause centriole amplification. *Curr Biol* **24**, 351–360  
619 (2014).
- 620 35. Wang, L., Failler, M., Fu, W. & Dynlacht, B. D. A distal centriolar protein network  
621 controls organelle maturation and asymmetry. *Nat Comms* **9**, 3938 (2018).
- 622 36. Zou, C. *et al.* Centrobin: a novel daughter centriole-associated protein that is  
623 required for centriole duplication. *J Cell Biol* **171**, 437–445 (2005).
- 624 37. Martin, C.-A. *et al.* Mutations in PLK4, encoding a master regulator of centriole  
625 biogenesis, cause microcephaly, growth failure and retinopathy. *Nat. Genet.* **46**,  
626 1283–1292 (2014).
- 627 38. Scheidecker, S. *et al.* Mutations in TUBGCP4 alter microtubule organization via the  
628  $\gamma$ -tubulin ring complex in autosomal-recessive microcephaly with chorioretinopathy.  
629 *Am. J. Hum. Genet.* **96**, 666–674 (2015).
- 630 39. Maver, A., Čuturilo, G., Kovanda, A., Miletić, A. & Peterlin, B. Rare missense  
631 TUBGCP5 gene variant in a patient with primary microcephaly. *Eur J Med Genet*  
632 (2018). doi:10.1016/j.ejmg.2018.12.003

- 633 40. Puffenberger, E. G. *et al.* Genetic mapping and exome sequencing identify variants  
634 associated with five novel diseases. *PLoS ONE* **7**, e28936 (2012).
- 635 41. Mitani, T. *et al.* Bi-allelic Pathogenic Variants in TUBGCP2 Cause Microcephaly and  
636 Lissencephaly Spectrum Disorders. *The American Journal of Human Genetics* **105**,  
637 1005–1015 (2019).
- 638 42. Hsia, K.-C. *et al.* Reconstitution of the augmin complex provides insights into its  
639 architecture and function. *Nat Cell Biol* **16**, 852–863 (2014).
- 640 43. Song, J.-G. *et al.* Mechanism of how augmin directly targets the  $\gamma$ -tubulin ring  
641 complex to microtubules. *J Cell Biol* **217**, 2417–2428 (2018).
- 642 44. Li, S., Fernandez, J.-J., Marshall, W. F. & Agard, D. A. Three-dimensional structure  
643 of basal body triplet revealed by electron cryo-tomography. *EMBO J* **31**, 552–562  
644 (2012).
- 645 45. Greenan, G. A., Keszthelyi, B., Vale, R. D. & Agard, D. A. Insights into centriole  
646 geometry revealed by cryotomography of doublet and triplet centrioles. *Elife* **7**, 351  
647 (2018).
- 648 46. Hamel, V. *et al.* Identification of Chlamydomonas Central Core Centriolar Proteins  
649 Reveals a Role for Human WDR90 in Ciliogenesis. *Curr Biol* **27**, 2486–2498.e6  
650 (2017).
- 651 47. Paintrand, M., Moudjou, M., Delacroix, H. & Bornens, M. Centrosome organization  
652 and centriole architecture: their sensitivity to divalent cations. *J Struct Biol* **108**, 107–  
653 128 (1992).
- 654 48. Ibrahim, R., Messaoudi, C., Chichon, F. J., Celati, C. & Marco, S. Electron  
655 tomography study of isolated human centrioles. *Microsc Res Tech* **72**, 42–48 (2009).
- 656 49. Wang, W.-J. *et al.* De novo centriole formation in human cells is error-prone and  
657 does not require SAS-6 self-assembly. *Elife* **4**, 1054 (2015).
- 658 50. Watanabe, S., Shioi, G., Furuta, Y. & Goshima, G. Intra-spindle Microtubule

- 659            Assembly Regulates Clustering of Microtubule-Organizing Centers during Early  
660            Mouse Development. *Cell Reports* **15**, 54–60 (2016).
- 661 51.    Tillberg, P. W. *et al.* Protein-retention expansion microscopy of cells and tissues  
662            labeled using standard fluorescent proteins and antibodies. *Nat Biotechnol* **34**, 987–  
663            992 (2016).
- 664 52.    Lecland, N. & Lüders, J. The dynamics of microtubule minus ends in the human  
665            mitotic spindle. *Nat Cell Biol* **16**, 770–778 (2014).
- 666 53.    Julian, M. *et al.* gamma-Tubulin participates in the formation of the midbody during  
667            cytokinesis in mammalian cells. *J Cell Sci* **105 ( Pt 1)**, 145–156 (1993).
- 668 54.    Ogungbenro, Y. A. *et al.* Centrobin controls primary ciliogenesis in vertebrates. *J*  
669            *Cell Biol* **217**, 1205–1215 (2018).
- 670 55.    Srsen, V., Fant, X., Heald, R., Rabouille, C. & Merdes, A. Centrosome proteins form  
671            an insoluble perinuclear matrix during muscle cell differentiation. *BMC Cell Biol* **10**,  
672            28 (2009).
- 673 56.    Comartin, D. *et al.* CEP120 and SPICE1 cooperate with CPAP in centriole  
674            elongation. *Curr Biol* **23**, 1360–1366 (2013).
- 675 57.    Teo, G. *et al.* SAINTexpress: improvements and additional features in Significance  
676            Analysis of INTeractome software. *J Proteomics* **100**, 37–43 (2014).
- 677

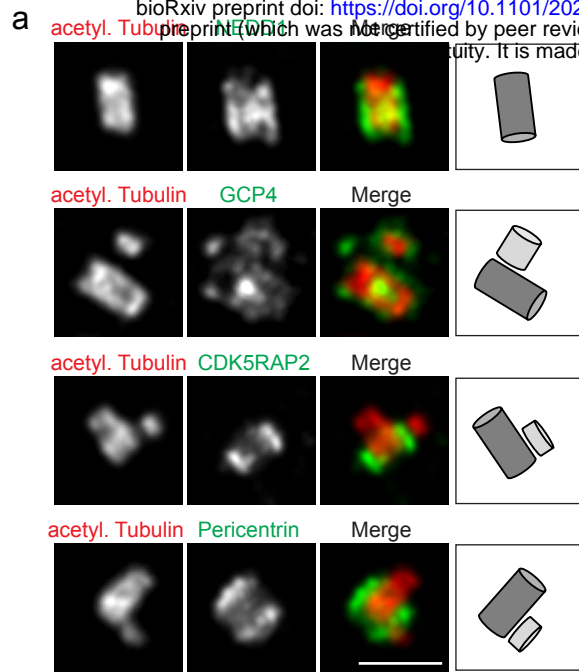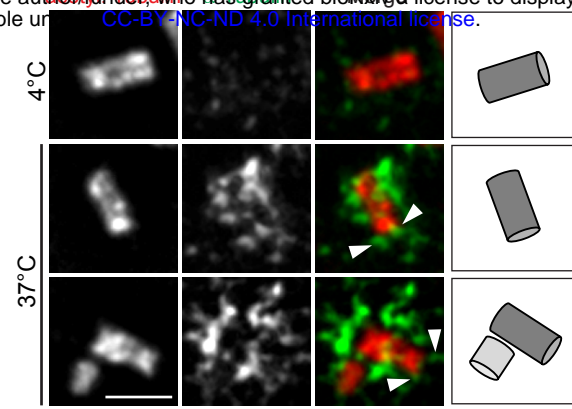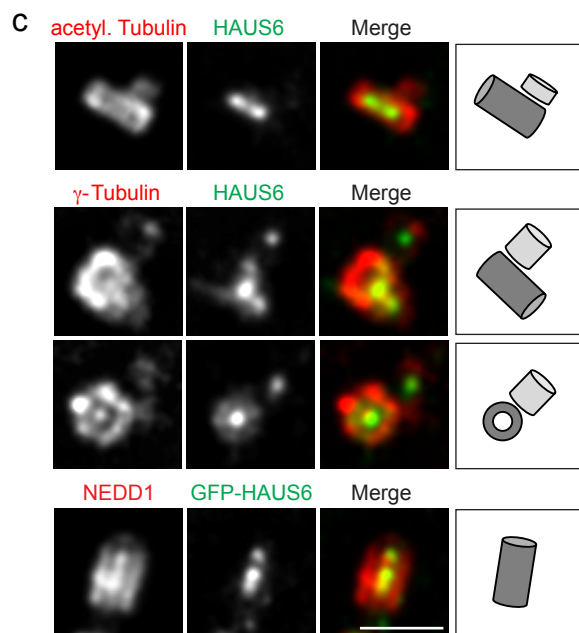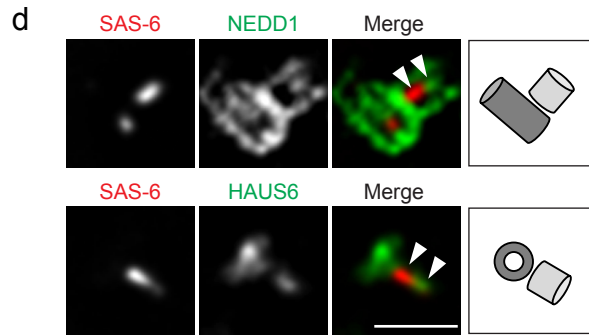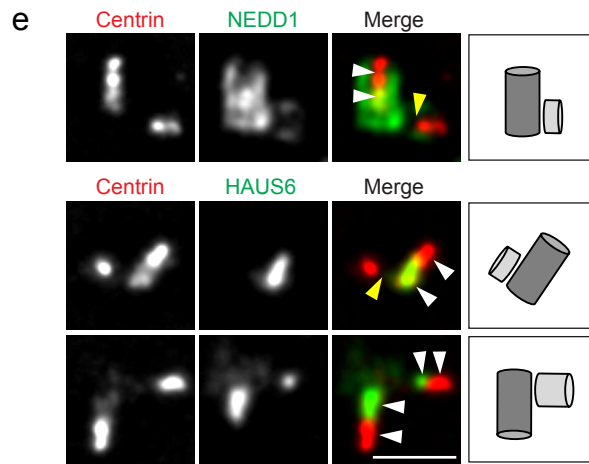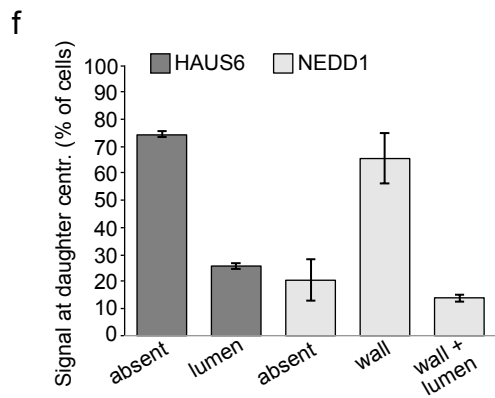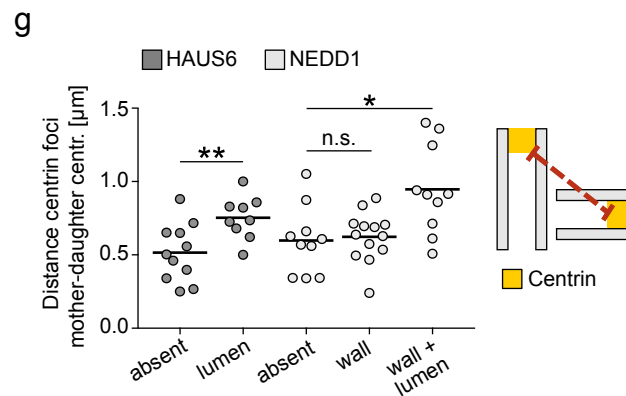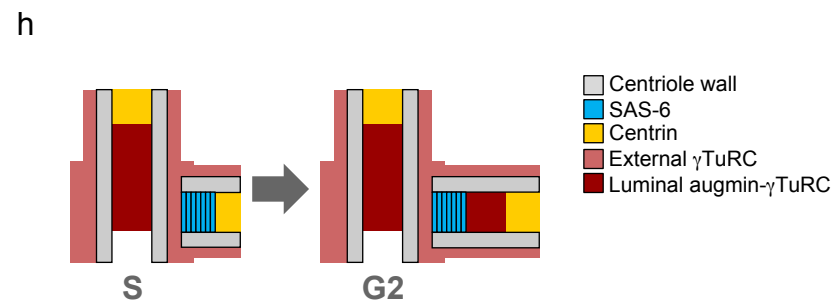

678 **Figure 1**  $\gamma$ TuRC forms distinct centrosomal sub-populations. **(a)** Centrioles of U2OS cells  
679 in ExM stained for acetylated  $\alpha$ -tubulin (red) and either NEDD1 (green), GCP4 (green),  
680 CDK5RAP2 (green) or pericentrin (green). **(b)** Centrioles and microtubules of interphase  
681 U2OS cells in ExM stained for acetylated  $\alpha$ -tubulin (red) and  $\alpha$ -tubulin (green) in a  
682 microtubule regrowth assay. Depicted is the condition before (4°C) and after (37°C)  
683 microtubule regrowth. Arrowheads point to microtubules associated with the distal  
684 centriole wall. **(c)** Centrioles of parental U2OS cells or U2OS cells stably expressing  
685 EGFP-HAUS6 in ExM stained for acetylated  $\alpha$ -tubulin (red) and HAUS6 (green),  $\gamma$ -tubulin  
686 (red) and HAUS6 (green) or NEDD1 (red) and GFP (EGFP-HAUS6, green). **(d)** Centrioles  
687 of U2OS cells in ExM stained for SAS-6 (red) and either NEDD1 (green) or HAUS6  
688 (green). Arrowheads point to adjacent signals of NEDD1/SAS-6 or HAUS6/SAS-6 in the  
689 daughter centriole lumen. **(e)** Centrioles of U2OS cells in ExM stained for centrin (red) and  
690 either NEDD1 (green) or HAUS6 (green). White arrowheads point to adjacent signals of  
691 NEDD1/centrin or HAUS6/centrin in the lumen of mother and daughter centrioles. Yellow  
692 arrowheads point to daughter centrioles that lack NEDD1 or HAUS6 in the lumen. **(f)**  
693 Quantifications of the percentage of cells with HAUS6 or NEDD1 at the wall/lumen of  
694 daughter centrioles. Error bars represent standard deviations from the mean obtained from  
695 two independent experiments (HAUS6 (absent):  $74.3 \pm 1.1\%$ , HAUS6 (lumen):  $25.8 \pm$   
696  $1.1\%$ , NEDD1 (absent):  $20.5 \pm 7.8\%$ , NEDD1 (wall):  $65.5 \pm 9.2\%$ , NEDD1 (wall and lumen):  
697  $14.0 \pm 1.4\%$ , mean  $\pm$  SD, 100-102 cells per condition and experiment). **(g)** Quantifications  
698 of the distance between the centrin foci of mother and daughter centrioles in cells where  
699 HAUS6 or NEDD1 are absent/present at daughter centrioles. One experiment, means are  
700 depicted as horizontal lines (HAUS6 (absent):  $0.5 \pm 0.2 \mu\text{m}$ , HAUS6 (lumen):  $0.8 \pm 0.2 \mu\text{m}$ ,  
701 NEDD1 (absent):  $0.6 \pm 0.2 \mu\text{m}$ , NEDD1 (wall):  $0.6 \pm 0.2 \mu\text{m}$ , NEDD1 (wall and lumen):  $0.9$   
702  $\pm 0.3 \mu\text{m}$ , mean  $\pm$  SD, 9-13 mother-daughter centriole pairs from 9-13 cells per condition,  
703  $p$  (HAUS6 absent/lumen)  $< 0.01$ ,  $p$  (NEDD1 absent/wall) = 0.762,  $p$  (NEDD1 absent/wall

704 and lumen) < 0.05). (h) Cartoon summarizing the localizations of distinct  $\gamma$ TuRC sub-  
705 populations. Cartoons in (a-e) illustrate centriole configurations in the corresponding  
706 panels, dark grey = mother centriole, light grey = daughter centriole. Bar (all panels), 2  $\mu$ m.

707 \*\* p < 0.01, \* p < 0.05, n.s. = not significant

708

709



710 **Figure 2**  $\gamma$ TuRC centriole localization depends on CEP192 and augmin. **(a)** Schematic  
711 depicting the experimental design. ~52 h after siRNA transfection, STLC was added to the  
712 culture medium for ~18 h to arrest cells in mitosis. Mitotic cells were collected, released  
713 into G1 by addition of RO-3306 and fixed ~4 h later. **(b)** Centrioles of control RNAi and  
714 CEP192 RNAi U2OS cells in ExM stained for centrin (red) and CEP192 (green). **(c)**  
715 Centrioles of control RNAi and CEP192 RNAi U2OS cells in ExM stained for acetylated  $\alpha$ -  
716 tubulin (red) and NEDD1 (green). **(d)** Centrioles of control RNAi and HAUS6 RNAi U2OS  
717 cells in ExM stained for  $\gamma$ -tubulin (red) and HAUS6 (green). White arrowhead points to a  
718 centriole that is not depleted of  $\gamma$ -tubulin, yellow arrowheads point to centrioles that lack  
719 HAUS6/luminal  $\gamma$ -tubulin. **(e)** Centrioles of control RNAi and NEDD1 RNAi U2OS cells in  
720 ExM stained for centrin (red) and NEDD1 (green). **(f)** Centrioles of control RNAi and  
721 NEDD1 RNAi U2OS cells in ExM stained for POC5 (red) and  $\gamma$ -tubulin (green). White  
722 arrowhead points to a centriole that has  $\gamma$ -tubulin in the lumen, yellow arrowheads point to  
723 centrioles that are depleted of  $\gamma$ -tubulin at the wall and in the lumen. Bar (all panels), 2  $\mu$ m.  
724 Cartoons illustrate centriole configurations in the corresponding panels.  
725  
726



**a**

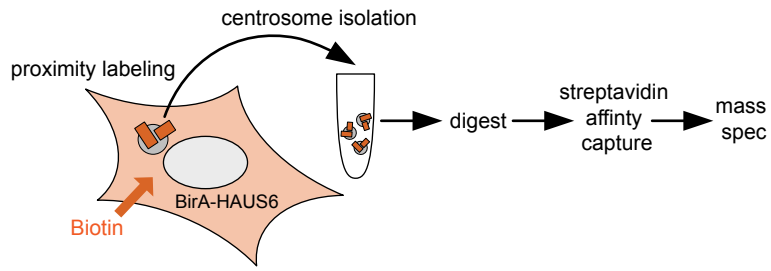

**BirA-HAUS6**

| Protein | AvgSpec | AvgSpecCtr | SaintScore |
|---------|---------|------------|------------|
| POC5    | 4.67    | 0.00       | 0.98       |
| HAUS6   | 5.00    | 0.00       | 0.98       |
| HAUS8   | 1.67    | 0.00       | 0.27       |

**b**

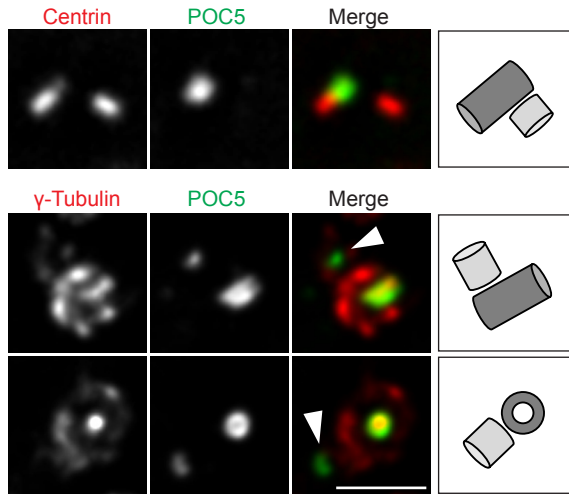

**c**

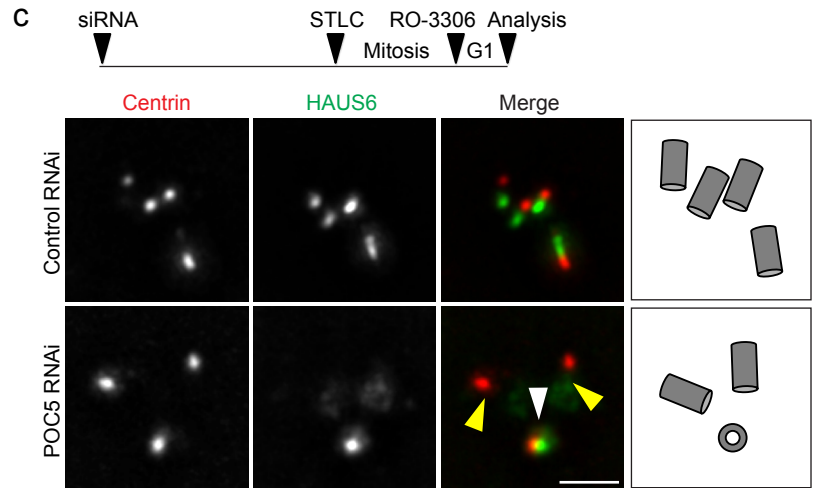

**d**

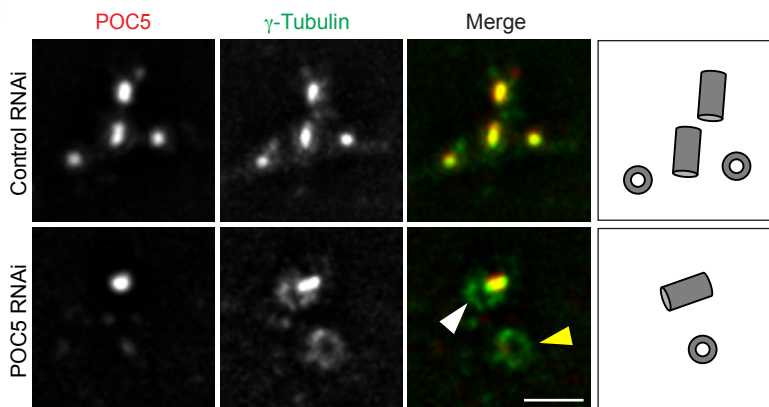

**e**

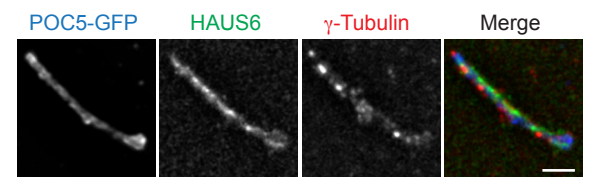

727 **Figure 3** Augmin is recruited to the inner centriole scaffold by POC5. **(a)** Mass  
728 spectrometry analysis of proximity interactors of BirA-HAUS6 from isolated centrosomes of  
729 U2OS cells. AvgSpec = average spectral counts, AvgSpecCtrl = average spectral counts  
730 in the control (parental U2OS cells). **(b)** Centrioles of U2OS cells in ExM stained for centrin  
731 (red) and POC5 (green) or  $\gamma$ -tubulin (red) and POC5 (green). Arrowheads point to POC5  
732 in the daughter centriole lumen. **(c,d)** Centrioles of control RNAi and POC5 RNAi U2OS  
733 cells in ExM stained for centrin (red) and HAUS6 (green) or POC5 (red) and  $\gamma$ -tubulin  
734 (green). White arrowheads point to centrioles with HAUS6 or  $\gamma$ -tubulin in the lumen, yellow  
735 arrowheads point to centrioles that lack HAUS6 or luminal  $\gamma$ -tubulin. Bar, 2  $\mu$ m. The  
736 schematic in **(c)** depicts the experimental design in **(c,d)**. ~52 h after siRNA transfection,  
737 STLC was added to the culture medium for ~18 h to arrest cells in mitosis. Mitotic cells  
738 were collected, released into G1 by addition of RO-3306 and fixed ~4 later. **(e)** POC5-GFP  
739 aggregate in ExM stained for GFP (POC5-GFP, blue), HAUS6 (green) and  $\gamma$ -tubulin (red).  
740 Bar (all panels), 2  $\mu$ m. Cartoons in **(b,c,d)** illustrate centriole configurations in the  
741 corresponding panels, dark grey = mother centriole, light grey = daughter centriole.  
742  
743

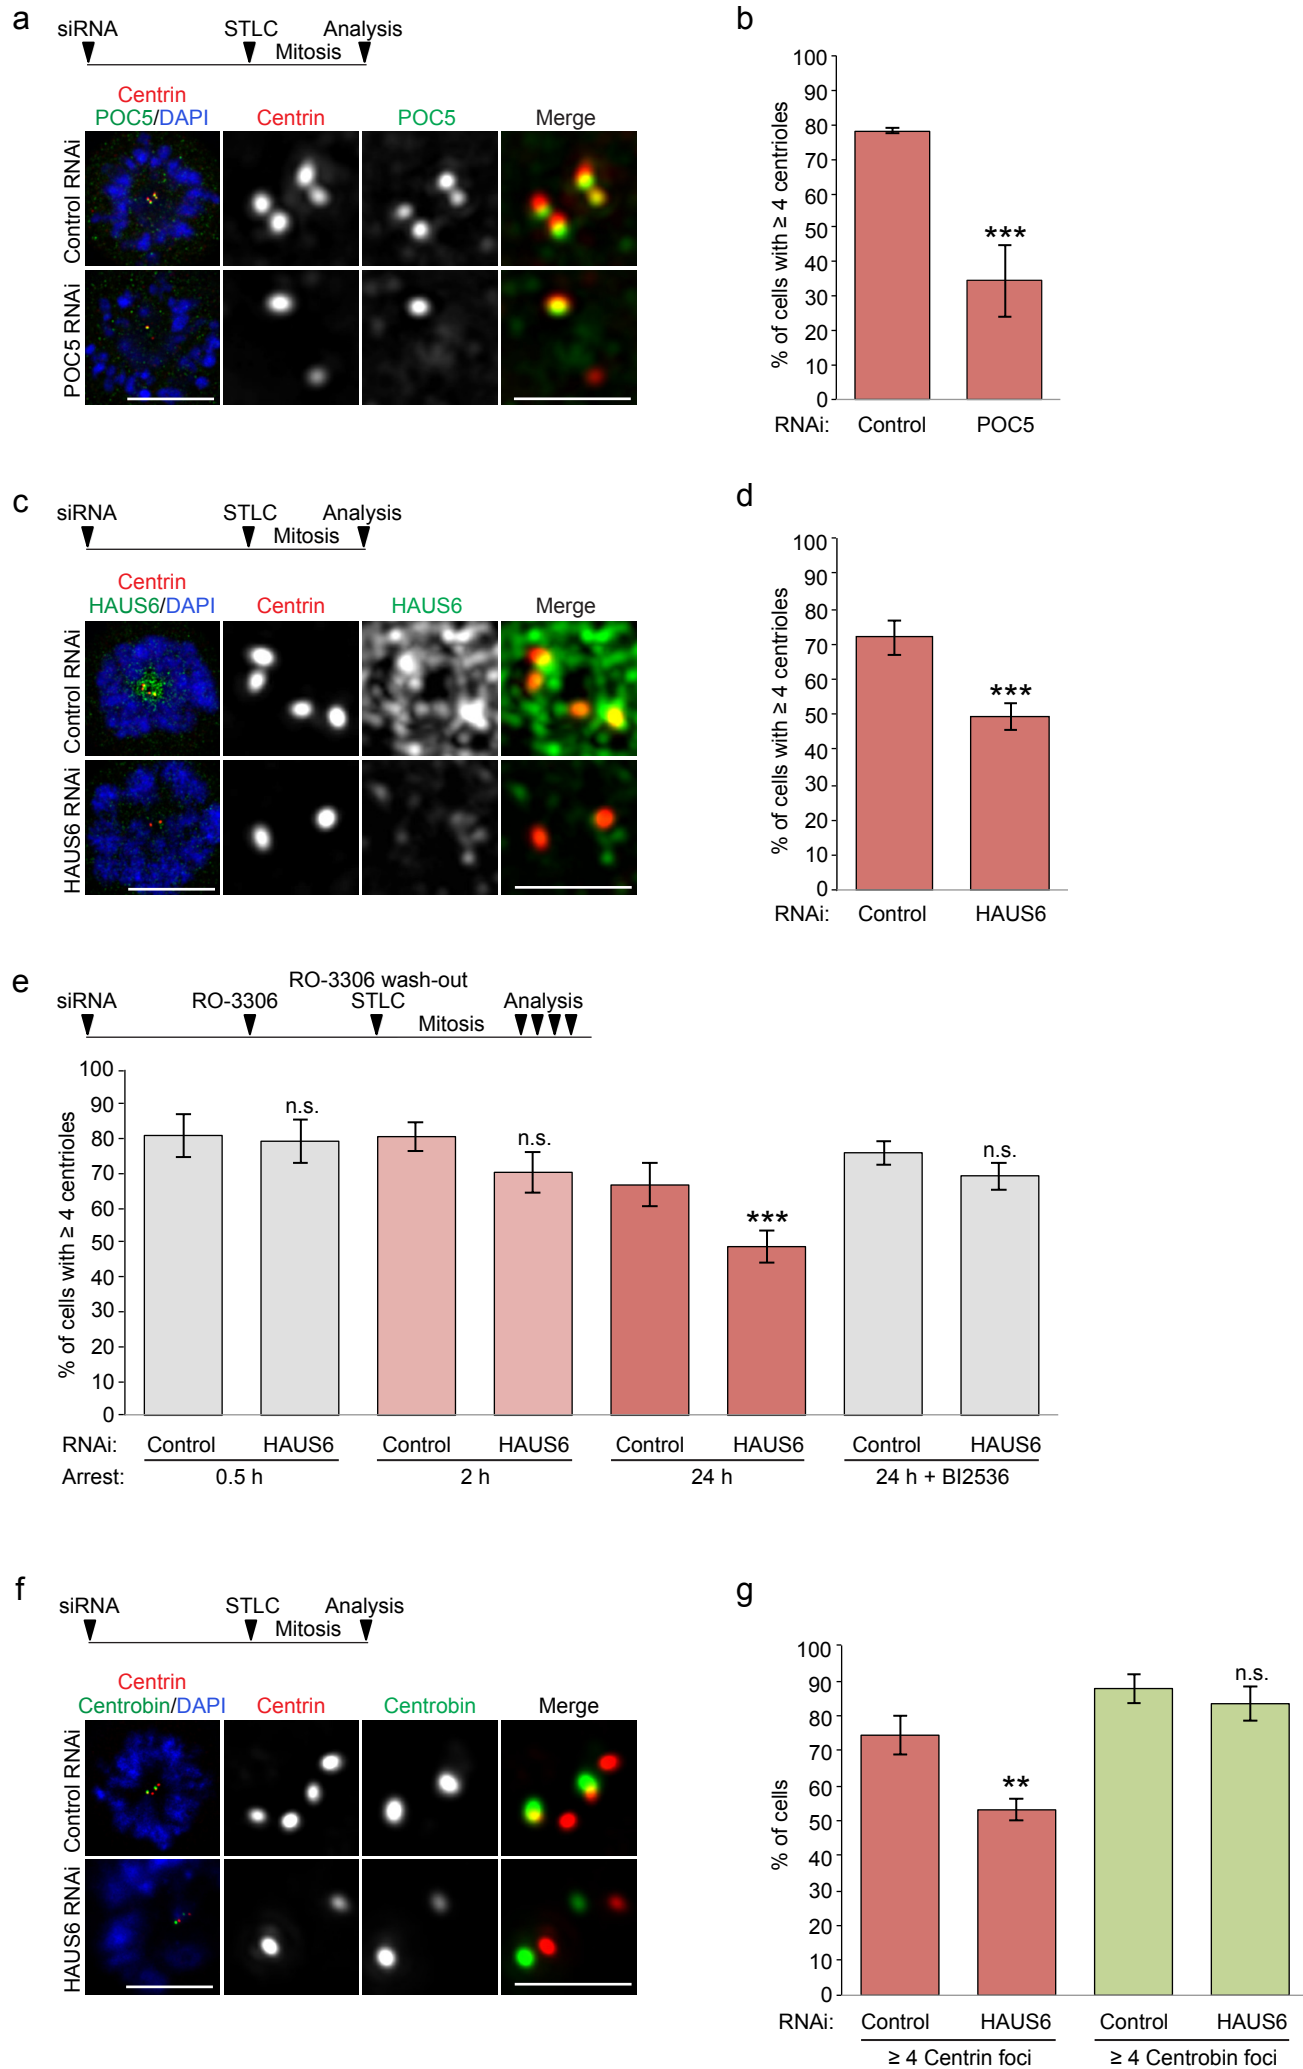

744 **Figure 4** POC5 and augmin promote centriole stability. **(a)** Control RNAi and POC5 RNAi  
745 U2OS cells arrested in mitosis with STLC stained for centrin (red), POC5 (green) and DNA  
746 (DAPI, blue). The experimental design is depicted schematically. ~52 h after siRNA  
747 transfection, STLC was added to the culture medium for ~18 h. **(b)** Quantifications of the  
748 percentage of control RNAi or POC5 RNAi U2OS cells with  $\geq 4$  centrioles (centrin foci)  
749 after spending up to ~18 h in mitosis. Error bars represent standard deviations from the  
750 mean obtained from three independent experiments (control RNAi:  $78 \pm 0.7\%$ , POC5  
751 RNAi:  $34.7 \pm 10.6\%$ , mean  $\pm$  SD, 239-337 cells per condition and experiment,  $p < 0.001$ ).  
752 **(c)** Control RNAi and HAUS6 RNAi U2OS cells arrested in mitosis with STLC stained for  
753 centrin (red), HAUS6 (green) and DNA (DAPI, blue). The experimental design is depicted  
754 schematically. ~52 h after siRNA transfection, STLC was added to the culture medium for  
755 ~18 h. **(d)** Quantifications of the percentage of control RNAi or HAUS6 RNAi U2OS cells  
756 with  $\geq 4$  centrioles (centrin foci) after spending up to ~18 h in mitosis. Error bars represent  
757 standard deviations from the mean obtained from four independent experiments (control  
758 RNAi:  $71.8 \pm 4.9\%$ , HAUS6 RNAi:  $49.5 \pm 3.9\%$ , mean  $\pm$  SD, 232-335 cells per condition  
759 and experiment,  $p < 0.001$ ). **(e)** Quantifications of the percentage of control RNAi or  
760 HAUS6 RNAi U2OS cells with  $\geq 4$  centrioles (centrin foci) after spending different times in  
761 mitosis, in the presence or absence of PLK1 inhibitor BI2536. Error bars represent  
762 standard deviations from the mean obtained from three to six independent experiments  
763 (control RNAi (0.5 h):  $81 \pm 6.2\%$ , HAUS6 RNAi (0.5 h):  $79.3 \pm 6.5\%$ ; mean  $\pm$  SD, 3  
764 experiments, 154-329 cells per condition and experiment,  $p = 0.765$ ; control RNAi (2 h):  
765  $80.7 \pm 4.2\%$ , HAUS6 RNAi (2 h):  $70.7 \pm 5.5\%$ , mean  $\pm$  SD, three experiments, 125-250  
766 cells per condition and experiment,  $p = 0.071$ ; control (24 h):  $66.7 \pm 6.4\%$ , HAUS6 RNAi  
767 (24 h):  $48.8 \pm 4.6\%$ ; mean  $\pm$  SD, 6 experiments, 115-350 cells per condition and  
768 experiment,  $p < 0.001$ ; control RNAi (24 h, BI2536):  $76.0 \pm 3.5\%$ , HAUS6 RNAi (24 h,  
769 BI2536):  $69.3 \pm 4.0\%$ ; mean  $\pm$  SD, 3 experiments, 110-311 cells per condition and

770 experiment,  $p = 0.100$ ). The experimental design is depicted schematically. ~52 h after  
771 siRNA transfection, RO-3306 was added to the culture medium for ~18 h to arrest cells in  
772 G2. RO-3306 was washed out and STLC was added to arrest cells in mitosis for defined  
773 time points. In some cases, BI2536 was added together with STLC, as indicated. (f)  
774 Control RNAi and HAUS6 RNAi U2OS cells arrested in mitosis with STLC stained for  
775 centrin (red), centrobilin (green) and DNA (DAPI, blue). The experimental design is  
776 depicted schematically. ~52 h after siRNA transfection, STLC was added to the culture  
777 medium for ~18 h. (g) Quantifications of the percentage of control RNAi or HAUS6 RNAi  
778 U2OS cells with  $\geq 4$  centrin foci or  $\geq 2$  centrobilin foci after spending up to ~18 h in mitosis.  
779 Error bars represent standard deviations from the mean obtained from three independent  
780 experiments (% of cells with  $\geq 4$  centrin foci, control RNAi:  $74.3 \pm 5.5\%$ , HAUS6 RNAi:  
781  $53.0 \pm 3.0\%$ ,  $p < 0.01$ ; % of cells with  $\geq 2$  centrobilin foci, control RNAi:  $87.7 \pm 4.2\%$ ,  
782 HAUS6 RNAi:  $83.3 \pm 5.1\%$ ; mean  $\pm$  SD, 300-504 cells per condition and experiment,  $p =$   
783  $0.32$ ). \*\*\*  $p < 0.001$ , \*\*  $p < 0.01$ ; n.s., not significant. Bar (all panels), 10  $\mu\text{m}$  (merge with  
784 DAPI) or 2  $\mu\text{m}$  (insets depicting centrioles).

785

786

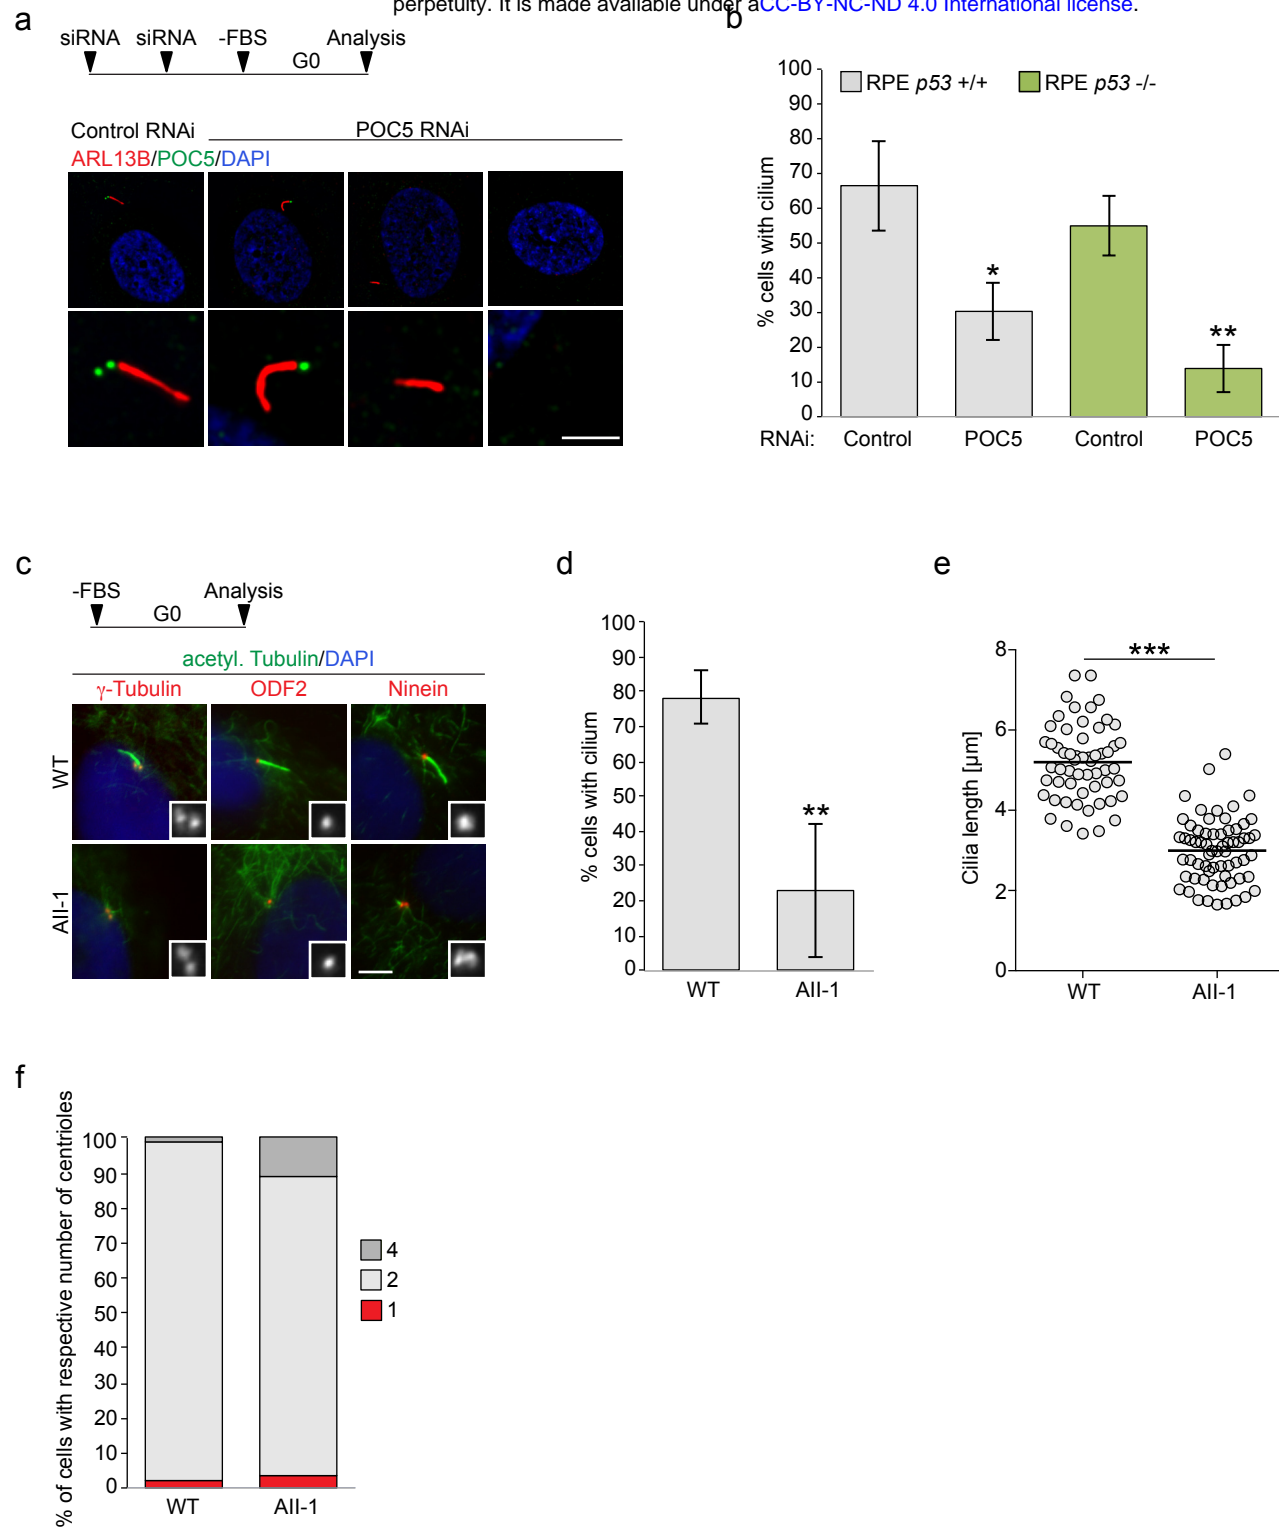

787 **Figure 5** POC5 and  $\gamma$ TuRC are required for ciliogenesis. **(a)** Serum-starved control RNAi  
788 and POC5 RNAi hTERT RPE1 cells stained for ARL13B (red), POC5 (green) and DNA  
789 (DAPI, blue). Bar, 10  $\mu$ m (merge with DAPI) or 2  $\mu$ m (insets depicting centrioles). The  
790 experimental design is depicted schematically. Cells were transfected two times with  
791 siRNA (second transfection after ~48 h) and serum-starved after a total of ~80-96 h for 48  
792 h before cells were fixed. **(b)** Quantifications of the percentage of ciliated control RNAi and  
793 POC5 RNAi hTERT RPE1 and hTERT RPE1 *p53*<sup>-/-</sup> cells. Error bars represent standard  
794 deviations from the mean obtained from three independent experiments (control RNAi  
795 hTERT RPE1: 66.6  $\pm$  13.1%, POC5 RNAi hTERT RPE1: 30.4  $\pm$  8.4%, mean  $\pm$  SD, 118-  
796 202 cells per condition and experiment,  $p < 0.05$ ; control RNAi hTERT RPE1 *p53*<sup>-/-</sup>: 55.0  
797  $\pm$  8.8%, POC5 RNAi hTERT RPE1 *p53*<sup>-/-</sup>: 13.9  $\pm$  6.9%, mean  $\pm$  SD, 82-113 cells per  
798 condition and experiment;  $p < 0.01$ ). **(c)** Serum-starved human fibroblasts, obtained from a  
799 control individual (WT) or a patient with a mutation in GCP4 (*All-1*) stained for acetylated  
800  $\alpha$ -tubulin (green) and either  $\gamma$ -tubulin (red), ODF2 (red) or ninein (red) and DNA (DAPI,  
801 blue). Insets show  $\gamma$ -tubulin, ODF2 or ninein, respectively. Bar, 5  $\mu$ m. **(d)** Quantifications of  
802 the percentage of ciliated control (WT) or patient (*All-1*) fibroblasts. Error bars represent  
803 standard deviations from the mean obtained from three independent experiments (WT:  
804 78.3%  $\pm$  7.5%, *All-1*: 23.0  $\pm$  19.0%, mean  $\pm$  SD, 99-122 cells per condition and  
805 experiment;  $p < 0.01$ ). **(e)** Quantifications of cilia length in serum-starved control (WT) or  
806 patient (*All-1*) fibroblasts. The mean is depicted as horizontal line (control: 5.2  $\pm$  0.9  $\mu$ m,  
807 *All-1*: 3.0  $\pm$  0.8  $\mu$ m, mean  $\pm$  SD,  $n = 57$ -65 cilia per condition, combined from three  
808 independent experiments,  $p < 0.001$ ). **(f)** Quantifications of the percentage of serum-  
809 starved control (WT) or patient (*All-1*) fibroblasts with 1, 2 or 4 centrioles. One experiment  
810 (WT (1 centriole): 1.9%, *All-1* (1 centriole): 3.5%, WT (2 centrioles): 97.1%, *All-1* (2  
811 centrioles): 85.2%; WT (4 centrioles): 1.0%, *All-1* (4 centrioles): 11.3%,  $n$  (WT) = 105 cells,

812 n (All-1) = 142 cells. Schematics depict the design of experiments. \*\*\*  $p < 0.001$ , \*\*  $p <$   
813  $0.01$ ; \*  $p < 0.05$ .  
814  
815



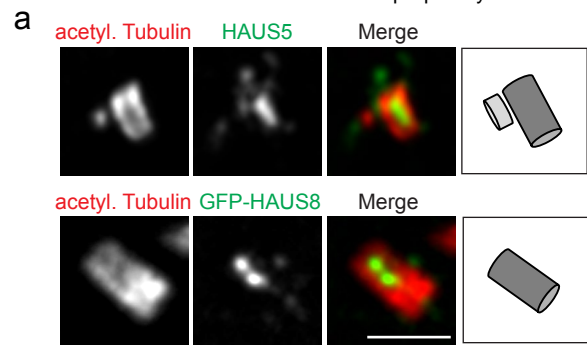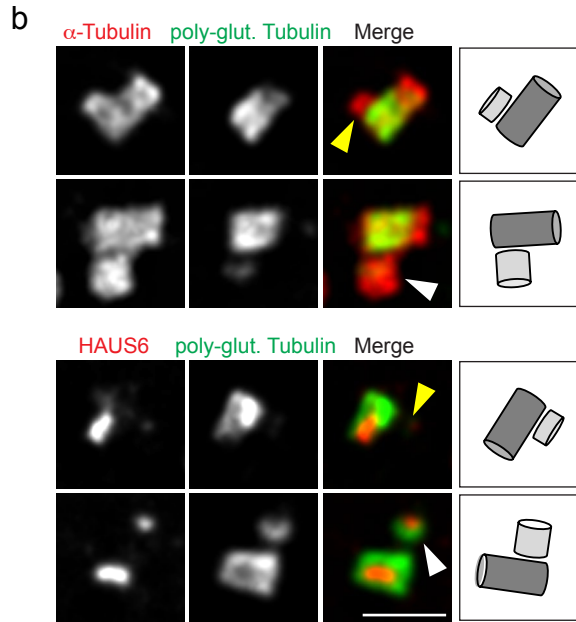

816 **Supplementary Figure 1** Augmin localizes to the centriole lumen late during the cell  
817 cycle. **(a)** Centrioles of parental U2OS cells or U2OS cells stably expressing EGFP-  
818 HAUS8 in ExM stained for acetylated  $\alpha$ -tubulin (red) and HAUS5 (green) or GFP (EGFP-  
819 HAUS8, green). **(b)** Centrioles of U2OS cells in ExM stained for  $\alpha$ -tubulin (red) and poly-  
820 glutamylated tubulin (green) or HAUS6 (red) and poly-glutamylated tubulin (green). Yellow  
821 arrowheads point to daughter centrioles that lack HAUS6/poly-glutamylation, white  
822 arrowheads point to poly-glutamylated daughter centrioles (that have HAUS6 in the  
823 lumen). Bar (all panels), 2  $\mu$ m. Cartoons illustrate centriole configurations in the  
824 corresponding panels, dark grey = mother centriole, light grey = daughter centriole.

825

826

## Supplementary Figure 2

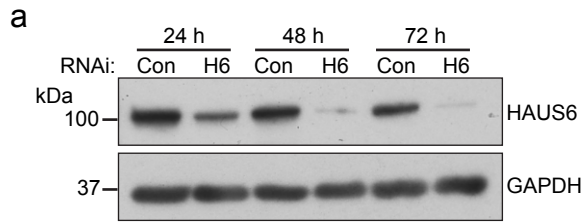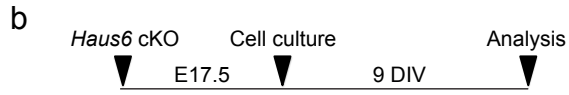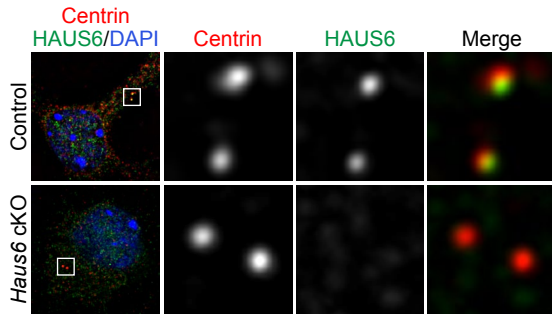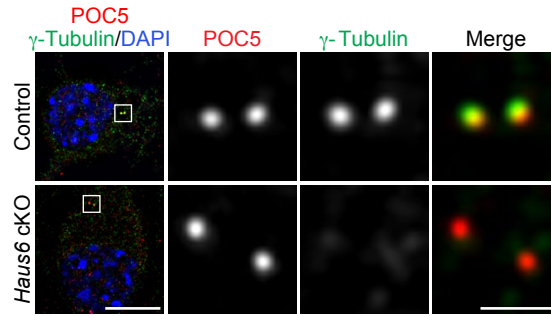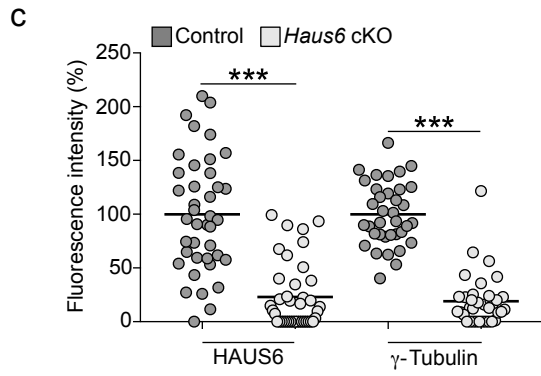

827 **Supplementary Figure 2**  $\gamma$ TuRC centriole lumen localization depends on augmin. **(a)**  
828 Western Blot analysis of HAUS6 from control RNAi and HAUS6 RNAi U2OS cells at  
829 different time points after siRNA transfection. GAPDH was used as loading control. **(b)**  
830 Murine control and *Haus6* cKO neurons at 9 DIV stained for centrin (red), HAUS6 (green)  
831 and DNA (DAPI, blue) or POC5 (red),  $\gamma$ -tubulin (green) and DNA (DAPI, blue). Bar, 10  $\mu$ m  
832 (merge with DAPI) or 1  $\mu$ m (insets depicting centrioles). The experimental design is  
833 depicted schematically. **(c)** Fluorescence signals for HAUS6 and  $\gamma$ -tubulin at centrioles in  
834 control and *Haus6* cKO neurons at 9 DIV, plotted as percentages of the signal in control  
835 cells (average intensity in control cells was set to 100%). The mean is depicted as  
836 horizontal line (HAUS6 fluorescence intensity in control and *Haus6* cKO, 100%  $\pm$  53.4%  
837 and 22.9%  $\pm$  30.8%, mean  $\pm$  SD, n = 40 centrioles from 20 cells per condition, combined  
838 from two independent experiments, p < 0.001;  $\gamma$ -tubulin fluorescence intensity in control  
839 and *Haus6* cKO, 100%  $\pm$  29.2% and 19.0%  $\pm$  23.8%, mean  $\pm$  SD, n = 36 centrioles from  
840 18 cells per condition, combined from two independent experiments, p < 0.001). \*\*\* p <  
841 0.001.

842

843

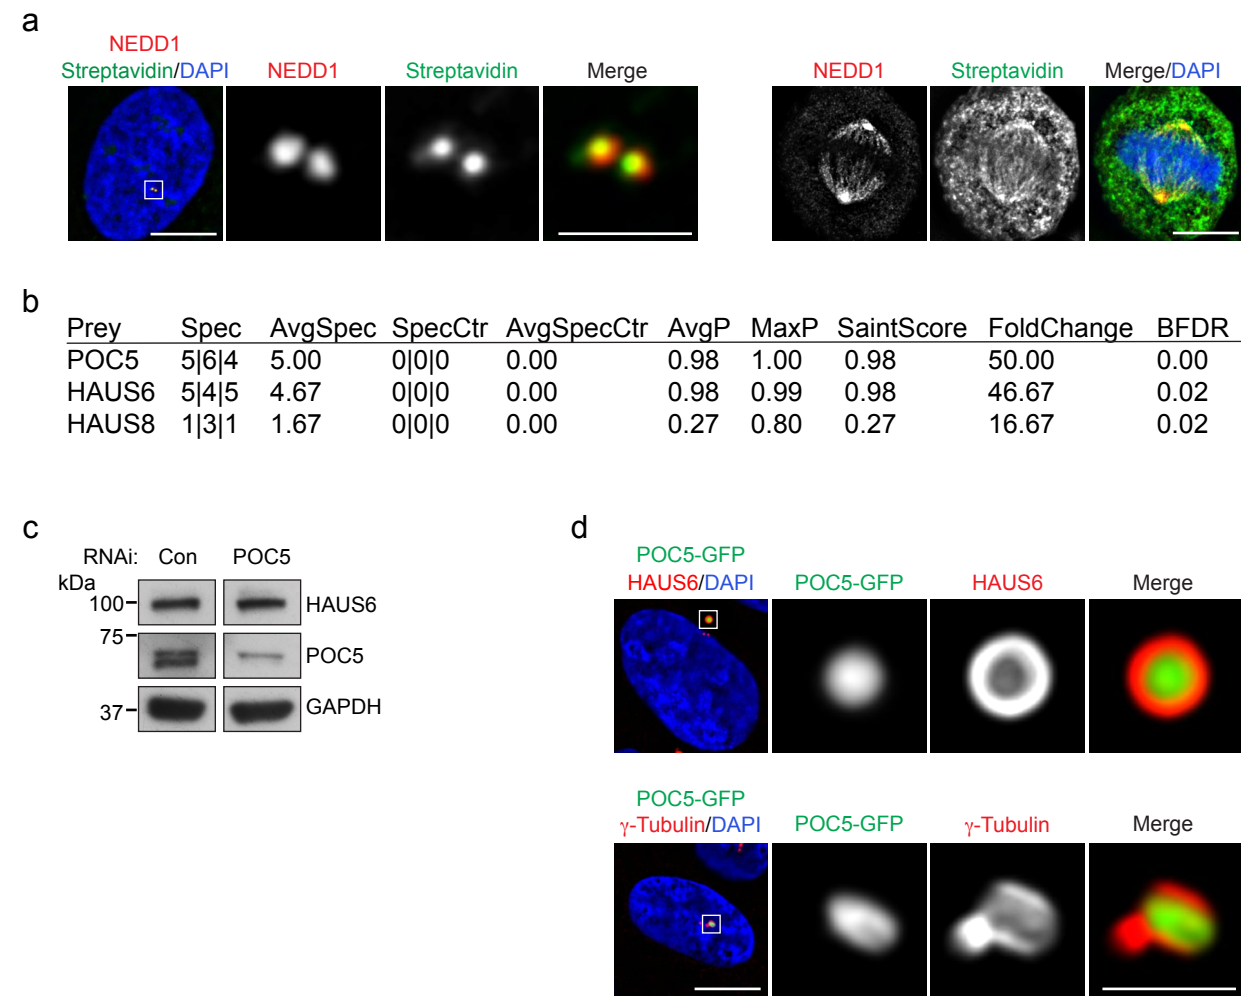

844 **Supplementary Figure 3** Identification of POC5 as a proximity interactor of HAUS6. **(a)**  
845 Interphase or mitotic U2OS cells stably expressing BirA-HAUS6 in the presence of biotin  
846 stained for NEDD1 (green), biotin (568-conjugated streptavidin, red) and DNA (DAPI,  
847 blue). **(b)** Mass spectrometry analysis of proximity interactors of BirA-HAUS6 from isolated  
848 centrosomes of U2OS cells. **(c)** Western Blot analysis of POC5 from control RNAi and  
849 POC5 RNAi U2OS cells. GAPDH was used as loading control. **(d)** U2OS cells stably  
850 expressing POC5-GFP stained for GFP (POC5-GFP, green), HAUS6 (red) or  $\gamma$ -tubulin  
851 (red) and DNA (DAPI, blue). Bar (all panels), 10  $\mu$ m or 2  $\mu$ m (insets).  
852  
853

# Supplementary Figure 4

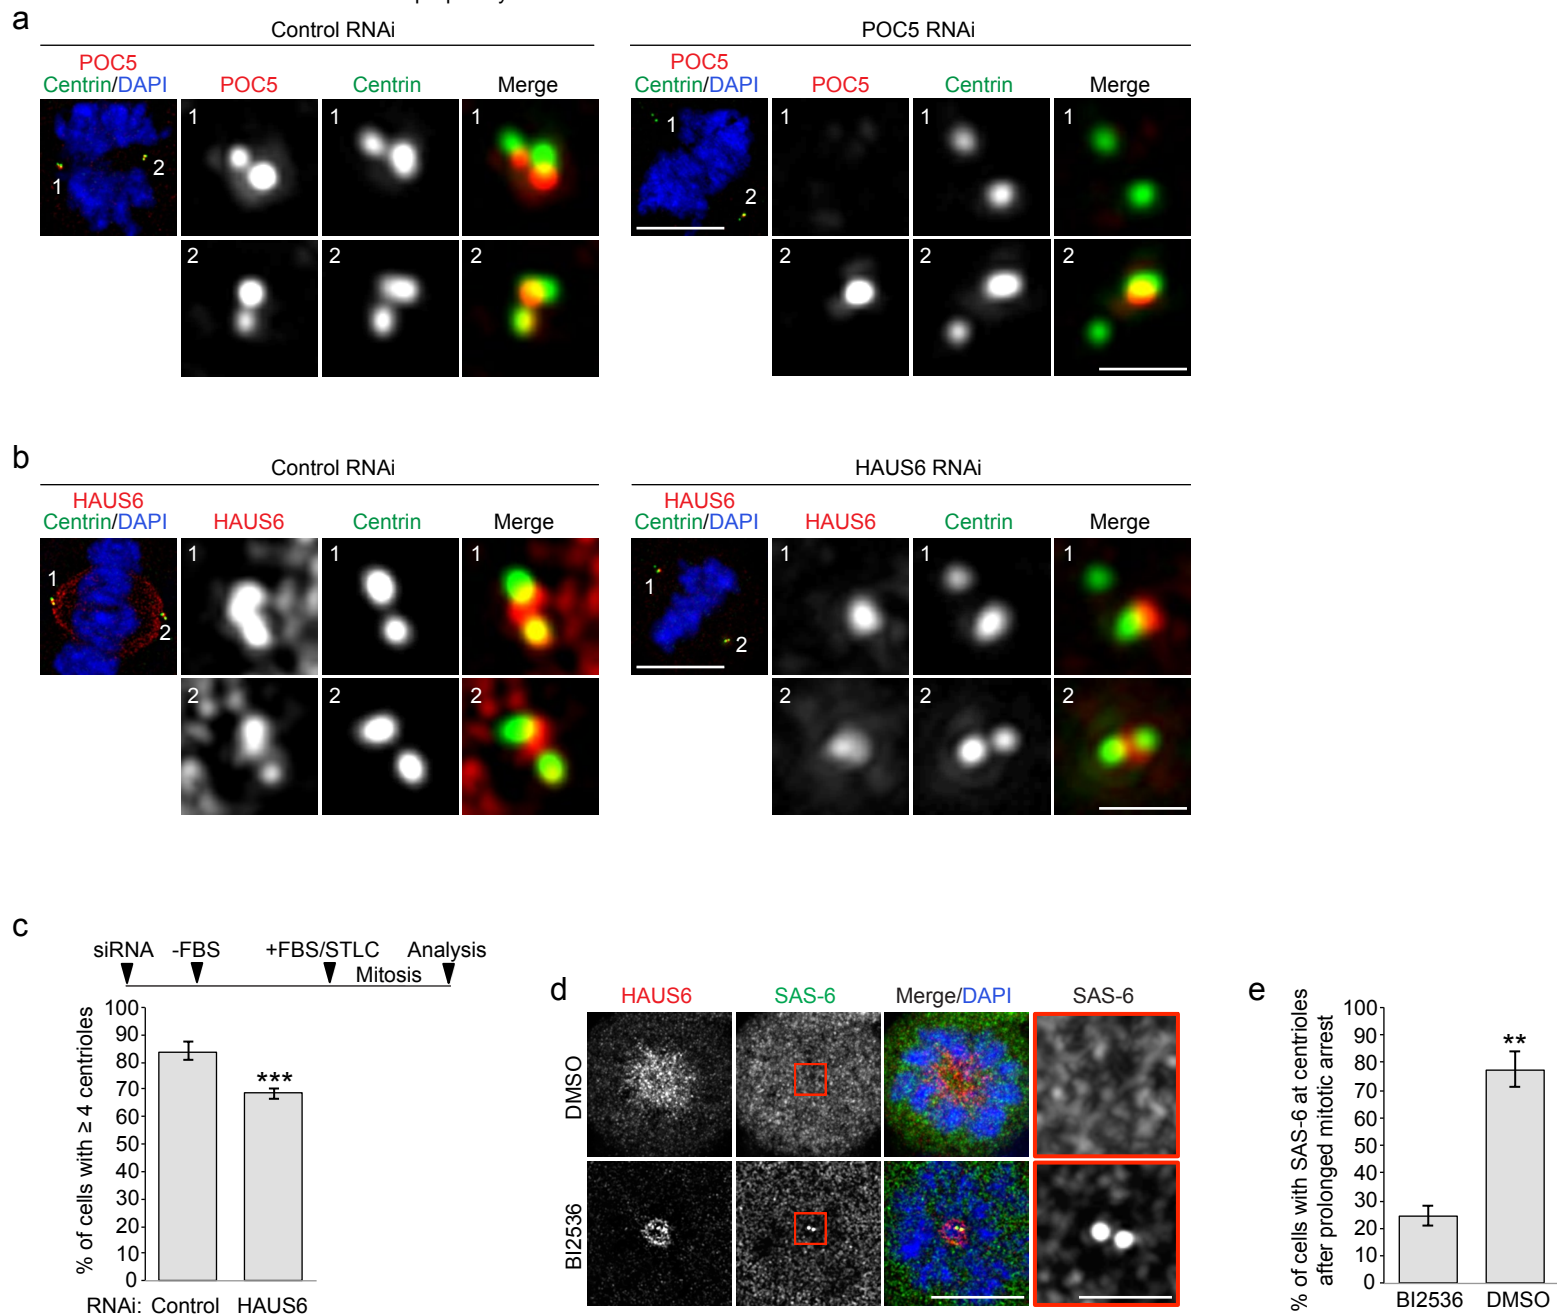

854 **Supplementary Figure 4** Centriole numbers are not reduced in cycling POC5 RNAi or  
855 HAUS6 RNAi cells. **(a)** Mitotic control RNAi or POC5 RNAi U2OS cells stained for POC5  
856 (red), centrin (green) and DNA (DAPI, blue). **(b)** Mitotic control RNAi or HAUS6 RNAi  
857 U2OS cells stained for HAUS6 (red), centrin (green) and DNA (DAPI, blue). **(c)**  
858 Quantifications of the percentage of control RNAi or HAUS6 RNAi hTERT RPE1 cells with  
859  $\geq 4$  centrioles (centrin foci) after prolonged mitotic arrest. Error bars represent standard  
860 deviations from the mean obtained from four independent experiments (control RNAi:  $84.0$   
861  $\pm 3.2\%$ , HAUS6 RNAi:  $68.5 \pm 1.9\%$ ; mean  $\pm$  SD, 100-500 cells per condition and  
862 experiment,  $p < 0.001$ ). The experimental design is depicted schematically. Cells were  
863 transfected with siRNA oligos and 5 h later serum-starved for  $\sim 73$  h. Subsequently, cells  
864 were released into medium containing FBS and STLC for  $\sim 25$  h before cells were fixed.  
865 **(d)** Control RNAi U2OS cells which spent 24 h in mitosis, with (BI2536) or without (DMSO)  
866 PLK1 inhibition, stained for HAUS6 (red), SAS-6 (green) and DNA (DAPI, blue). **(e)**  
867 Quantifications of the percentage of cells with SAS-6 at centrioles, with (BI2536) or without  
868 (DMSO) PLK1 inhibition after spending 24 h in mitosis. Error bars represent standard  
869 deviations from the mean obtained from two independent experiments (without PLK1  
870 inhibition:  $24.5 \pm 3.5\%$ , with PLK1 inhibition:  $77.5 \pm 6.4\%$ , mean  $\pm$  SD, 100-200 cells per  
871 condition and experiment,  $p < 0.01$ ). \*\*  $p < 0.01$ . Bar (all panels),  $10 \mu\text{m}$  or  $1 \mu\text{m}$  (insets).

872

873

874

875

876

877
